# Supplementary material for: ZnJ6 Is a Thylakoid Membrane DnaJ-Like Chaperone with Oxidizing Activity in Chlamydomonas reinhardtii
Source: Int J Mol Sci. 2021 Jan 24;22(3):1136. doi: 10.3390/ijms22031136 (PMC7865324; doi:10.3390/ijms22031136)
Supplement: Supplementary file 1 [file ijms-22-01136-s001.zip › Supplementary Material/Supplementary Table S1, Mass spectrometry analysis of pulled down proteins.xlsx]

## Sheet: 8 Fold filter
Intensity MBP control 1	Intensity MBP control 2	Intensity MBP control 3	Intensity Zn CreO6 1	Intensity Zn CreO6 2	Intensity Zn CreO6 3	LFQ intensity MBP control 1	LFQ intensity MBP control 2	LFQ intensity MBP control 3	LFQ intensity Zn CreO6 1	LFQ intensity Zn CreO6 2	LFQ intensity Zn CreO6 3	Only identified by site	Mol. weight [kDa]	Q-value	Score	Razor + unique peptides MBP control 1	Razor + unique peptides MBP control 2	Razor + unique peptides MBP control 3	Razor + unique peptides Zn CreO6 1	Razor + unique peptides Zn CreO6 2	Razor + unique peptides Zn CreO6 3	Intensity MBP control 1_1	Intensity MBP control 2_1	Intensity MBP control 3_1	Intensity Zn CreO6 1_1	Intensity Zn CreO6 2_1	Intensity Zn CreO6 3_1	LFQ intensity MBP control 1_1	LFQ intensity MBP control 2_1	LFQ intensity MBP control 3_1	LFQ intensity Zn CreO6 1_1	LFQ intensity Zn CreO6 2_1	LFQ intensity Zn CreO6 3_1	Student's T-test p-value MBP control_Zn CreO6-Intensity	Student's T-test q-value MBP control_Zn CreO6-Intensity	Student's T-test Difference MBP control_Zn CreO6-Intensity	Student's T-test Test statistic MBP control_Zn CreO6-Intensity	Student's T-test p-value LFQ MBP contro_LFQ Zn CreO6-LFQ	Student's T-test q-value LFQ MBP contro_LFQ Zn CreO6-LFQ	Student's T-test Difference LFQ MBP contro_LFQ Zn CreO6-LFQ	Student's T-test Test statistic LFQ MBP contro_LFQ Zn CreO6-LFQ	Protein IDs	Majority protein IDs	Fasta headers	Razor + unique peptides
22.0988	18	18	30.5042	29.853	30.4563	22.2437	18	18	29.6145	29.9335	29.7035		36.892	0	240.9	1	0	0	16	13	16	4491700	0	0	1522899968	969750016	1473200000	4966000	0	0	821960000	1025400000	874249984	0.00139594	0	-10.9049	-5.79355	0.00188164	0.00190769	-10.336	-5.38965	Cre04.g214150.t1.1	Cre04.g214150.t1.1	>Cre04.g214150.t1.1 pacid=30791074 transcript=Cre04.g214150.t1.1 locus=Cre04.g214150 ID=Cre04.g214150.t1.1.v5.5 annot-version=v5.5	16
18	18	18	27.5969	27.9222	28.0897	18	18	18	27.2316	27.7873	27.6002		28.511	0	55.912	0	0	0	6	5	6	0	0	0	203000000	254340000	285649984	0	0	0	157590000	231640000	203460000	2.76526e-07	0	-9.86959	-15.3097	5.13478e-07	0	-9.53969	-14.3834	Cre01.g051900.t1.2	Cre01.g051900.t1.2	>Cre01.g051900.t1.2 pacid=30789261 transcript=Cre01.g051900.t1.2 locus=Cre01.g051900 ID=Cre01.g051900.t1.2.v5.5 annot-version=v5.5	6
18	18	18	27.1581	27.5226	27.1614	18	18	18	26.5198	27.3616	26.9415		40.5	0	140.32	0	0	0	8	8	7	0	0	0	149760000	192810000	150110000	0	0	0	96216000	172450000	128880000	1.72894e-07	0	-9.28071	-14.9459	3.25849e-06	0	-8.94094	-12.0333	Cre06.g261800.t1.2	Cre06.g261800.t1.2	>Cre06.g261800.t1.2 pacid=30780036 transcript=Cre06.g261800.t1.2 locus=Cre06.g261800 ID=Cre06.g261800.t1.2.v5.5 annot-version=v5.5	9
18	18	18	27.3897	26.6214	27.5233	18	18	18	26.2745	26.9851	26.97		52.803	0	13.354	0	0	0	4	3	4	0	0	0	175840000	103240000	192900000	0	0	0	81175000	132840000	131460000	5.2398e-06	0	-9.17813	-11.7516	3.08421e-06	0	-8.74323	-11.9054	Cre01.g004500.t1.2	Cre01.g004500.t1.2	>Cre01.g004500.t1.2 pacid=30789545 transcript=Cre01.g004500.t1.2 locus=Cre01.g004500 ID=Cre01.g004500.t1.2.v5.5 annot-version=v5.5	4
18	18	18	27.6893	26.216	27.3147	18	18	18	26.6649	26.6284	26.8469		34.017	0	125.16	0	0	0	8	6	9	0	0	0	216430000	77950000	166930000	0	0	0	106400000	103740000	120700000	3.32858e-05	0	-9.07335	-9.63114	2.16743e-08	0	-8.71339	-15.3524	Cre13.g581600.t1.2	Cre13.g581600.t1.2	>Cre13.g581600.t1.2 pacid=30784147 transcript=Cre13.g581600.t1.2 locus=Cre13.g581600 ID=Cre13.g581600.t1.2.v5.5 annot-version=v5.5	9
23.1949	23.8609	19.448	30.1616	30.1407	30.8004	21.2192	23.1762	19.4228	29.2694	30.2407	30.3894		56.195	0	323.31	2	4	1	16	18	18	9602000	15235000	715200	1200999936	1183699968	1870000000	2441300	9478500	702840	647080000	1268700032	1406400000	0.00413631	0.00331429	-8.19962	-4.33739	0.00158398	0.00185075	-8.69372	-5.30325	Cre08.g359350.t1.2	Cre08.g359350.t1.2	>Cre08.g359350.t1.2 pacid=30773866 transcript=Cre08.g359350.t1.2 locus=Cre08.g359350 ID=Cre08.g359350.t1.2.v5.5 annot-version=v5.5	20
18	18	18	27.3482	26.8165	26.8182	18	18	18	26.5364	26.6994	26.6572		44.852	0	82.614	0	0	0	4	4	3	0	0	0	170850000	118190000	118330000	0	0	0	97334000	108970000	105830000	8.95982e-07	0	-8.99431	-13.287	6.13956e-09	0	-8.63099	-15.7265	Cre09.g410700.t1.2	Cre09.g410700.t1.2	>Cre09.g410700.t1.2 pacid=30781064 transcript=Cre09.g410700.t1.2 locus=Cre09.g410700 ID=Cre09.g410700.t1.2.v5.5 annot-version=v5.5	4
18	18	18	27.1549	26.6483	27.1095	18	18	18	26.3995	26.919	26.4234		21.525	0	25.95	0	0	0	3	2	4	0	0	0	149430000	105180000	144800000	0	0	0	88523000	126890000	90000000	6.34074e-07	0	-8.97089	-13.5546	9.07193e-07	0	-8.58066	-12.8201	Cre11.g467689.t1.1	Cre11.g467689.t1.1	>Cre11.g467689.t1.1 pacid=30775730 transcript=Cre11.g467689.t1.1 locus=Cre11.g467689 ID=Cre11.g467689.t1.1.v5.5 annot-version=v5.5	4
18	18	18	26.2512	27.0054	26.9796	18	18	18	25.8768	26.9382	26.4637		25.879	0	51.467	0	0	0	4	5	5	0	0	0	79872000	134720000	132330000	0	0	0	61616000	128590000	92548000	3.81052e-06	0	-8.74538	-11.7041	1.04756e-05	0	-8.42624	-10.4418	Cre16.g680000.t1.2	Cre16.g680000.t1.2	>Cre16.g680000.t1.2 pacid=30777101 transcript=Cre16.g680000.t1.2 locus=Cre16.g680000 ID=Cre16.g680000.t1.2.v5.5 annot-version=v5.5	5
18	18	18	26.7474	26.5928	26.8517	18	18	18	26.0157	26.6529	26.3868		18.747	0	21.773	0	0	0	4	4	4	0	0	0	112660000	101210000	121110000	0	0	0	67842000	105520000	87747000	3.30529e-08	0	-8.73064	-15.1778	1.4334e-06	0	-8.35182	-12.1961	Cre09.g393173.t1.1	Cre09.g393173.t1.1	>Cre09.g393173.t1.1 pacid=30780340 transcript=Cre09.g393173.t1.1 locus=Cre09.g393173 ID=Cre09.g393173.t1.1.v5.5 annot-version=v5.5	4
18	18	18	26.889	26.7666	26.6415	18	18	18	26.0915	26.9421	26.0066		38.845	0	122.93	0	0	0	3	3	3	0	0	0	124280000	114170000	104690000	0	0	0	71503000	128940000	67416000	2.64591e-08	0	-8.76573	-15.3397	9.75736e-06	0	-8.34674	-10.4504	Cre13.g576760.t1.1	Cre13.g576760.t1.1	>Cre13.g576760.t1.1 pacid=30784132 transcript=Cre13.g576760.t1.1 locus=Cre13.g576760 ID=Cre13.g576760.t1.1.v5.5 annot-version=v5.5	3
18	18	18	26.2761	26.6602	26.7516	18	18	18	25.5117	26.7078	26.3077		9.4587	0	91.637	0	0	0	2	2	2	0	0	0	81263000	106050000	112990000	0	0	0	47839000	109610000	83061000	5.01728e-07	0	-8.56263	-13.2614	2.02579e-05	0	-8.17572	-9.60114	Cre07.g318450.t1.2	Cre07.g318450.t1.2	>Cre07.g318450.t1.2 pacid=30774741 transcript=Cre07.g318450.t1.2 locus=Cre07.g318450 ID=Cre07.g318450.t1.2.v5.5 annot-version=v5.5	2
18	18	18	26.2117	25.7721	27.1779	18	18	18	25.1917	26.6053	26.2115		115.13	0	44.251	0	0	0	6	5	9	0	0	0	77717000	57303000	151830000	0	0	0	38322000	102090000	77704000	3.54494e-05	0	-8.38724	-9.16446	4.52013e-05	0	-8.00281	-8.68739	Cre10.g452450.t1.2	Cre10.g452450.t1.2	>Cre10.g452450.t1.2 pacid=30790862 transcript=Cre10.g452450.t1.2 locus=Cre10.g452450 ID=Cre10.g452450.t1.2.v5.5 annot-version=v5.5	9
18	18	18	26.3774	25.748	26.4232	18	18	18	25.7141	25.8326	25.8955		18.84	0	21.893	0	0	0	2	2	2	0	0	0	87174000	56353000	89985000	0	0	0	55046000	59756000	62419000	2.99906e-06	0	-8.18285	-11.3994	1.28509e-08	0	-7.81407	-14.1262	Cre10.g434200.t1.1	Cre10.g434200.t1.1	>Cre10.g434200.t1.1 pacid=30790509 transcript=Cre10.g434200.t1.1 locus=Cre10.g434200 ID=Cre10.g434200.t1.1.v5.5 annot-version=v5.5	2
18	18	18	26.5609	25.9163	26.1289	18	18	18	25.6154	25.8765	25.8675		42.32	0	56.363	0	0	0	7	6	6	0	0	0	98997000	63326000	73379000	0	0	0	51404000	61604000	61221000	1.70848e-06	0	-8.20201	-11.8932	8.75144e-08	0	-7.78647	-13.2969	Cre07.g338451.t1.1	Cre07.g338451.t1.1	>Cre07.g338451.t1.1 pacid=30774250 transcript=Cre07.g338451.t1.1 locus=Cre07.g338451 ID=Cre07.g338451.t1.1.v5.5 annot-version=v5.5	7
18	18	18	25.4688	25.8476	26.4037	18	18	18	25.6333	25.5327	25.7013		16.875	0	310.14	0	0	0	4	4	4	0	0	0	46437000	60383000	88780000	0	0	0	52046000	48540000	54559000	8.27778e-06	0	-7.90671	-10.2483	1.02306e-08	0	-7.62242	-13.8846	Cre13.g581650.t1.2	Cre13.g581650.t1.2	>Cre13.g581650.t1.2 pacid=30784593 transcript=Cre13.g581650.t1.2 locus=Cre13.g581650 ID=Cre13.g581650.t1.2.v5.5 annot-version=v5.5	4
18	18	18	25.8524	26.0858	26.0037	18	18	18	25.1787	26.064	25.5964		29.63	0	44.287	0	0	0	4	4	4	0	0	0	60582000	71219000	67279000	0	0	0	37979000	70155000	50733000	3.22619e-08	0	-7.9806	-14.0418	7.57984e-06	0	-7.61305	-10.074	Cre16.g665250.t1.2	Cre16.g665250.t1.2	>Cre16.g665250.t1.2 pacid=30777313 transcript=Cre16.g665250.t1.2 locus=Cre16.g665250 ID=Cre16.g665250.t1.2.v5.5 annot-version=v5.5	4
18	22.063	18	28.1385	27.8272	27.3936	18	23.8209	18	27.2932	27.5951	27.4483		51.705	0	41.619	0	1	0	7	8	6	0	4381600	0	295480000	238130000	176320000	0	14819000	0	164470000	202750000	183130000	0.00354961	0.00351515	-8.43208	-4.50563	0.0180831	0.00607692	-7.50524	-3.07306	Cre02.g099850.t1.1	Cre02.g099850.t1.1	>Cre02.g099850.t1.1 pacid=30785418 transcript=Cre02.g099850.t1.1 locus=Cre02.g099850 ID=Cre02.g099850.t1.1.v5.5 annot-version=v5.5	8
18	18	18	26.4156	24.5256	26.0774	18	18	18	25.6628	25.0915	25.3663		44.71	0	20.772	0	0	0	3	2	3	0	0	0	89512000	24152000	70810000	0	0	0	53123000	35752000	43254000	0.000191052	0	-7.67289	-7.09224	1.49812e-06	0	-7.37356	-11.0887	Cre17.g701700.t2.1;Cre17.g701700.t1.2	Cre17.g701700.t2.1;Cre17.g701700.t1.2	>Cre17.g701700.t2.1 pacid=30782625 transcript=Cre17.g701700.t2.1 locus=Cre17.g701700 ID=Cre17.g701700.t2.1.v5.5 annot-version=v5.5;>Cre17.g701700.t1.2 pacid=30782624 transcript=Cre17.g701700.t1.2 locus=Cre17.g701700 ID=Cre17.g701700.t1.2.v5.5 annot-version	3
18	18	18	25.734	24.8859	26.4954	18	18	18	24.763	25.3924	25.9145		37.439	0	9.7661	0	0	0	3	3	5	0	0	0	55809000	31003000	94606000	0	0	0	28471000	44042000	63246000	7.75955e-05	0	-7.70511	-7.98578	2.48148e-05	0	-7.35661	-8.83269	Cre03.g172300.t1.2	Cre03.g172300.t1.2	>Cre03.g172300.t1.2 pacid=30787311 transcript=Cre03.g172300.t1.2 locus=Cre03.g172300 ID=Cre03.g172300.t1.2.v5.5 annot-version=v5.5	5
22.181	22.6962	21.0649	29.1179	29.0482	29.3503	21.2832	22.7996	20.804	28.6308	29.0003	28.8621		39.759	0	103.55	1	1	1	13	12	13	4754800	6795600	2193600	582600000	555100032	684409984	2552000	7300500	1830800	415660000	536969984	487940000	0.000125445	0	-7.19147	-7.26387	0.000296455	0.00217544	-7.20214	-6.48248	Cre12.g485150.t1.2	Cre12.g485150.t1.2	>Cre12.g485150.t1.2 pacid=30792279 transcript=Cre12.g485150.t1.2 locus=Cre12.g485150 ID=Cre12.g485150.t1.2.v5.5 annot-version=v5.5	13
18	18	21.7195	27.9125	26.872	28.3208	18	18	23.9546	26.3705	26.8214	28.2137		67.536	0	56.975	0	0	1	10	6	9	0	0	3453300	252630000	122820000	335289984	0	0	16258000	86760000	118590000	311289984	0.00298073	0.003625	-8.4619	-4.66805	0.0255965	0.00735714	-7.15032	-2.79207	Cre02.g141400.t1.2	Cre02.g141400.t1.2	>Cre02.g141400.t1.2 pacid=30784858 transcript=Cre02.g141400.t1.2 locus=Cre02.g141400 ID=Cre02.g141400.t1.2.v5.5 annot-version=v5.5	10
21.8541	18	18	27.6424	26.9362	27.5004	23.2122	18	18	25.8266	27.6669	26.8478		49.509	0	62.766	1	0	0	7	5	7	3790900	0	0	209500000	128410000	189870000	9717900	0	0	59509000	213090000	120780000	0.00344437	0.00348	-8.07496	-4.47942	0.0179031	0.00686792	-7.04303	-3.03956	Cre12.g546050.t1.2	Cre12.g546050.t1.2	>Cre12.g546050.t1.2 pacid=30793428 transcript=Cre12.g546050.t1.2 locus=Cre12.g546050 ID=Cre12.g546050.t1.2.v5.5 annot-version=v5.5	7
18	18	18	25.7103	24.7093	25.4409	18	18	18	24.8107	24.8193	25.1114		40.832	0	9.2508	0	0	0	2	1	1	0	0	0	54900000	27431000	45549000	0	0	0	29428000	29605000	36247000	1.68323e-05	0	-7.28684	-9.11931	2.50014e-07	0	-6.91379	-11.5458	Cre12.g518900.t1.2	Cre12.g518900.t1.2	>Cre12.g518900.t1.2 pacid=30792620 transcript=Cre12.g518900.t1.2 locus=Cre12.g518900 ID=Cre12.g518900.t1.2.v5.5 annot-version=v5.5	2
18	18	18	25.2303	25.179	25.4019	18	18	18	24.5799	25.1166	25.015		13.502	0	3.2671	0	0	0	2	2	2	0	0	0	39361000	37988000	44335000	0	0	0	25078000	36378000	33905000	4.43047e-08	0	-7.27042	-12.8134	1.93072e-06	0	-6.90383	-10.3882	Cre05.g240300.t1.1	Cre05.g240300.t1.1	>Cre05.g240300.t1.1 pacid=30783072 transcript=Cre05.g240300.t1.1 locus=Cre05.g240300 ID=Cre05.g240300.t1.1.v5.5 annot-version=v5.5	2
18	21.9644	22.5637	26.0045	24.5206	25.1555	18	18	18	24.941	25.0414	24.6756		49.196	0	14.939	0	1	1	5	3	3	0	4092200	6199200	67319000	24067000	37374000	0	0	0	32211000	34532000	26797000	0.0427025	0.0104304	-4.38417	-2.19761	3.78017e-07	0	-6.88602	-11.3045	Cre12.g560800.t1.2	Cre12.g560800.t1.2	>Cre12.g560800.t1.2 pacid=30793220 transcript=Cre12.g560800.t1.2 locus=Cre12.g560800 ID=Cre12.g560800.t1.2.v5.5 annot-version=v5.5	5
18	18	18	25.4747	24.8203	25.5777	18	18	18	24.5568	24.585	25.451		38.407	0	4.0869	0	0	0	3	3	3	0	0	0	46627000	29625000	50079000	0	0	0	24680000	25167000	45867000	6.67046e-06	0	-7.29089	-9.89048	1.97993e-05	0	-6.86427	-8.65115	Cre12.g500950.t1.2	Cre12.g500950.t1.2	>Cre12.g500950.t1.2 pacid=30792003 transcript=Cre12.g500950.t1.2 locus=Cre12.g500950 ID=Cre12.g500950.t1.2.v5.5 annot-version=v5.5	3
22.9965	18	18	27.6269	26.7859	27.3069	24.0092	18	18	26.9432	26.7828	26.7709		22.779	0	38.874	1	0	0	5	4	4	8368200	0	0	207260000	115710000	166030000	16884000	0	0	129040000	115460000	114510000	0.0108276	0.00363636	-7.5744	-3.46904	0.0270741	0.00729204	-6.82927	-2.72754	Cre09.g416800.t1.2	Cre09.g416800.t1.2	>Cre09.g416800.t1.2 pacid=30780761 transcript=Cre09.g416800.t1.2 locus=Cre09.g416800 ID=Cre09.g416800.t1.2.v5.5 annot-version=v5.5	5
18	18	18	25.6284	24.0856	25.6486	18	18	18	24.6654	24.5022	25.2015		49.227	0	55.732	0	0	0	2	1	2	0	0	0	51871000	17803000	52600000	0	0	0	26609000	23763000	38585000	0.000161824	0	-7.12087	-6.99731	5.58414e-06	0	-6.78972	-9.54647	Cre03.g158000.t1.2	Cre03.g158000.t1.2	>Cre03.g158000.t1.2 pacid=30786587 transcript=Cre03.g158000.t1.2 locus=Cre03.g158000 ID=Cre03.g158000.t1.2.v5.5 annot-version=v5.5	2
22.9547	18	18	27.8151	26.331	27.9804	24.7615	18	18	27.4795	26.4289	26.9466		22.203	0	121.35	1	0	0	4	4	4	8129300	0	0	236140000	84418000	264820000	28442000	0	0	187130000	90342000	129340000	0.0111824	0.00357724	-7.72395	-3.45927	0.0421708	0.00669919	-6.69781	-2.41436	Cre09.g416150.t1.2	Cre09.g416150.t1.2	>Cre09.g416150.t1.2 pacid=30780210 transcript=Cre09.g416150.t1.2 locus=Cre09.g416150 ID=Cre09.g416150.t1.2.v5.5 annot-version=v5.5	5
18	18	18	25.2166	24.8611	25.0996	18	18	18	24.6827	24.7909	24.5995		48.005	0	19.271	0	0	0	4	4	4	0	0	0	38990000	30474000	35953000	0	0	0	26929000	29027000	25421000	2.88954e-07	0	-7.0591	-11.6754	2.81913e-08	0	-6.69102	-12.0471	Cre10.g452800.t1.2	Cre10.g452800.t1.2	>Cre10.g452800.t1.2 pacid=30790505 transcript=Cre10.g452800.t1.2 locus=Cre10.g452800 ID=Cre10.g452800.t1.2.v5.5 annot-version=v5.5	4
18	18	18	25.1813	24.3787	25.7268	18	18	18	24.5851	24.7229	24.7413		49.618	0	9.5611	0	0	0	3	4	4	0	0	0	38047000	21813000	55530000	0	0	0	25169000	27690000	28046000	5.45011e-05	0	-7.09558	-7.95906	1.77116e-08	0	-6.6831	-12.1673	Cre12.g549550.t1.2;	Cre12.g549550.t1.2;Cre12.g542250.t1.1	>Cre12.g549550.t1.2 pacid=30793443 transcript=Cre12.g549550.t1.2 locus=Cre12.g549550 ID=Cre12.g549550.t1.2.v5.5 annot-version=v5.5;>Cre12.g542250.t1.1 pacid=30793243 transcript=Cre12.g542250.t1.1 locus=Cre12.g542250 ID=Cre12.g542250.t1.1.v5.5 annot-version	4
18	18	18	24.7923	25.3964	24.7439	18	18	18	24.217	25.293	24.4263		10.553	0	4.4392	0	0	0	2	1	2	0	0	0	29056000	44164000	28096000	0	0	0	19500000	41110000	22545000	4.88316e-06	0	-6.97752	-9.82901	3.56236e-05	0	-6.64542	-8.01258	Cre02.g142246.t1.1	Cre02.g142246.t1.1	>Cre02.g142246.t1.1 pacid=30785143 transcript=Cre02.g142246.t1.1 locus=Cre02.g142246 ID=Cre02.g142246.t1.1.v5.5 annot-version=v5.5	2
18	18	18	25.4811	23.59	25.4343	18	18	18	24.1418	24.5664	24.9276		39.728	0	25.363	0	0	0	4	3	3	0	0	0	46836000	12627000	45341000	0	0	0	18510000	24844000	31911000	0.000391437	0	-6.83515	-6.08805	8.62241e-06	0	-6.54525	-9.0022	Cre07.g338050.t1.2	Cre07.g338050.t1.2	>Cre07.g338050.t1.2 pacid=30774560 transcript=Cre07.g338050.t1.2 locus=Cre07.g338050 ID=Cre07.g338050.t1.2.v5.5 annot-version=v5.5	4
18	18	18	25.7979	23.8946	24.9399	18	18	18	24.4963	23.8496	25.135		62.309	0	14.267	0	0	0	4	3	3	0	0	0	58337000	15595000	32186000	0	0	0	23665000	15116000	36846000	0.000235838	0	-6.87747	-6.54792	6.26115e-05	0	-6.49361	-7.45471	Cre08.g358526.t1.1	Cre08.g358526.t1.1	>Cre08.g358526.t1.1 pacid=30774039 transcript=Cre08.g358526.t1.1 locus=Cre08.g358526 ID=Cre08.g358526.t1.1.v5.5 annot-version=v5.5	4
18	18	18	25.3445	23.0358	25.4626	18	18	18	24.3365	23.9541	24.9237		38.977	0	20.153	0	0	0	4	3	4	0	0	0	42605000	8599200	46238000	0	0	0	21184000	16252000	31827000	0.00111302	0.00111628	-6.61429	-5.12738	2.22561e-05	0	-6.40478	-8.19041	Cre17.g722750.t1.2	Cre17.g722750.t1.2	>Cre17.g722750.t1.2 pacid=30782324 transcript=Cre17.g722750.t1.2 locus=Cre17.g722750 ID=Cre17.g722750.t1.2.v5.5 annot-version=v5.5	4
18	18	18	25.257	23.1283	25.1096	18	18	18	24.1809	24.3716	24.2626		71.954	0	8.4033	0	1	0	2	2	2	0	0	0	40098000	9168900	36203000	0	0	0	19019000	21706000	20126000	0.000694114	0	-6.49832	-5.47771	3.60533e-08	0	-6.2717	-11.2958	Cre06.g250100.t1.2	Cre06.g250100.t1.2	>Cre06.g250100.t1.2 pacid=30778980 transcript=Cre06.g250100.t1.2 locus=Cre06.g250100 ID=Cre06.g250100.t1.2.v5.5 annot-version=v5.5	3
18	18	18	24.6209	24.8333	24.3824	18	18	18	23.9807	24.7831	23.9993		42.811	0	34.853	0	0	0	2	2	2	0	0	0	25801000	29892000	21869000	0	0	0	16554000	28871000	16769000	9.00489e-07	0	-6.61219	-10.4917	1.8946e-05	0	-6.25436	-8.18171	Cre07.g325400.t1.2	Cre07.g325400.t1.2	>Cre07.g325400.t1.2 pacid=30775347 transcript=Cre07.g325400.t1.2 locus=Cre07.g325400 ID=Cre07.g325400.t1.2.v5.5 annot-version=v5.5	2
24.0363	18	23.12	28.8092	28.6378	28.9582	23.8767	18	24.5765	28.0478	28.9204	28.1649		41.871	0	54.287	2	0	1	7	6	7	17205000	0	9116300	470369984	417680000	521540000	15403000	0	25019000	277480000	508049984	300950016	0.0196596	0.00451429	-7.08297	-2.97555	0.0415314	0.00664516	-6.22664	-2.39192	Cre01.g015350.t1.1	Cre01.g015350.t1.1	>Cre01.g015350.t1.1 pacid=30789577 transcript=Cre01.g015350.t1.1 locus=Cre01.g015350 ID=Cre01.g015350.t1.1.v5.5 annot-version=v5.5	7
18	18	18	23.5647	23.7273	25.6043	18	18	18	24.0825	24.5125	24.0778		48.543	0	20.052	0	0	0	1	1	3	0	0	0	12407000	13888000	51010000	0	0	0	17765000	23933000	17707000	0.000651639	0	-6.29875	-5.45607	1.71819e-06	0	-6.22428	-9.66332	Cre11.g467723.t2.1;Cre11.g467723.t1.1	Cre11.g467723.t2.1;Cre11.g467723.t1.1	>Cre11.g467723.t2.1 pacid=30775834 transcript=Cre11.g467723.t2.1 locus=Cre11.g467723 ID=Cre11.g467723.t2.1.v5.5 annot-version=v5.5;>Cre11.g467723.t1.1 pacid=30775833 transcript=Cre11.g467723.t1.1 locus=Cre11.g467723 ID=Cre11.g467723.t1.1.v5.5 annot-version	3
18	18	18	24.3981	24.5605	24.725	18	18	18	23.5135	24.7657	24.1471		43.654	0	2.8504	0	0	0	2	2	2	0	0	0	22108000	24743000	27732000	0	0	0	11975000	28524000	18578000	2.56663e-07	0	-6.56121	-11.0385	7.0344e-05	0	-6.1421	-7.12976	Cre10.g434450.t1.2	Cre10.g434450.t1.2	>Cre10.g434450.t1.2 pacid=30790825 transcript=Cre10.g434450.t1.2 locus=Cre10.g434450 ID=Cre10.g434450.t1.2.v5.5 annot-version=v5.5	2
18	18	18	24.5174	24.043	24.8614	18	18	18	23.8052	24.1795	24.3338		44.541	0	4.7769	0	0	0	3	2	3	0	0	0	24014000	17285000	30481000	0	0	0	14658000	19000000	21145000	1.07248e-05	0	-6.47393	-8.78125	2.60707e-06	0	-6.10616	-9.29479	Cre06.g252200.t1.2	Cre06.g252200.t1.2	>Cre06.g252200.t1.2 pacid=30779515 transcript=Cre06.g252200.t1.2 locus=Cre06.g252200 ID=Cre06.g252200.t1.2.v5.5 annot-version=v5.5	3
18	18	18	24.5896	24.8495	24.0297	18	18	18	23.7856	24.8944	23.6354		10.479	0	6.0669	0	0	0	2	2	2	0	0	0	25246000	30230000	17126000	0	0	0	14460000	31187000	13031000	1.14723e-05	0	-6.48957	-8.74751	0.000104342	0	-6.10515	-6.80605	Cre12.g499800.t1.2	Cre12.g499800.t1.2	>Cre12.g499800.t1.2 pacid=30791902 transcript=Cre12.g499800.t1.2 locus=Cre12.g499800 ID=Cre12.g499800.t1.2.v5.5 annot-version=v5.5	2
18	18	18	23.1608	24.5161	24.9432	18	18	18	23.6168	24.1149	24.44		35.247	0	2.3481	0	0	0	1	2	2	0	0	0	9377400	23992000	32260000	0	0	0	12864000	18168000	22760000	0.000320781	0	-6.20668	-5.98346	1.44813e-05	0	-6.05724	-8.19246	Cre16.g676550.t1.2	Cre16.g676550.t1.2	>Cre16.g676550.t1.2 pacid=30778157 transcript=Cre16.g676550.t1.2 locus=Cre16.g676550 ID=Cre16.g676550.t1.2.v5.5 annot-version=v5.5	2
18	18	18	24.5879	24.083	24.552	18	18	18	23.7988	24.1111	24.177		33.834	0	124.9	0	0	0	2	2	2	0	0	0	25218000	17771000	24597000	0	0	0	14593000	18120000	18967000	2.4801e-06	0	-6.40765	-9.66979	8.38746e-07	0	-6.02895	-9.77695	Cre15.g638500.t1.2	Cre15.g638500.t1.2	>Cre15.g638500.t1.2 pacid=30783696 transcript=Cre15.g638500.t1.2 locus=Cre15.g638500 ID=Cre15.g638500.t1.2.v5.5 annot-version=v5.5	2
25.1007	22.8982	20.7544	30.1864	29.4926	29.6102	24.6404	23.3222	21.676	29.8704	29.574	28.2311		26.577	0	42.199	4	3	1	12	12	10	35980000	7817300	1768900	1221799936	755360000	819529984	26152000	10488000	3350600	981520000	799219968	315060000	0.00577715	0.00305263	-6.84527	-3.86111	0.00378105	0.00293023	-6.01229	-4.02204	Cre01.g002500.t1.2	Cre01.g002500.t1.2	>Cre01.g002500.t1.2 pacid=30788346 transcript=Cre01.g002500.t1.2 locus=Cre01.g002500 ID=Cre01.g002500.t1.2.v5.5 annot-version=v5.5	13
18	18	18	24.6501	23.9113	24.531	18	18	18	23.8683	24.1843	23.9067		30.966	0	2.5105	0	0	0	2	1	2	0	0	0	26328000	15777000	24242000	0	0	0	15313000	19063000	15727000	9.97321e-06	0	-6.36414	-8.7299	4.57929e-07	0	-5.98642	-9.98491	Cre03.g204350.t1.2	Cre03.g204350.t1.2	>Cre03.g204350.t1.2 pacid=30787499 transcript=Cre03.g204350.t1.2 locus=Cre03.g204350 ID=Cre03.g204350.t1.2.v5.5 annot-version=v5.5	2
18	18	18	23.7249	23.4825	25.1853	18	18	18	23.7001	23.8886	24.2133		91.204	0	5.9343	0	0	0	1	1	3	0	0	0	13865000	11720000	38152000	0	0	0	13628000	15531000	19450000	0.000323298	0	-6.13089	-5.94188	2.43107e-06	0	-5.93399	-9.13102	Cre06.g269050.t1.2	Cre06.g269050.t1.2	>Cre06.g269050.t1.2 pacid=30779340 transcript=Cre06.g269050.t1.2 locus=Cre06.g269050 ID=Cre06.g269050.t1.2.v5.5 annot-version=v5.5	3
18	18	20.7428	26.8187	24.7152	26.1549	18	18	22.9762	25.1864	25.2874	26.0886		43.71	0	7.0981	0	0	1	5	3	4	0	0	1754700	118370000	27544000	74715000	0	0	8251500	38182000	40951000	71359000	0.00321085	0.00334615	-6.98202	-4.34981	0.0252862	0.00716522	-5.86205	-2.68518	Cre07.g337650.t1.2	Cre07.g337650.t1.2	>Cre07.g337650.t1.2 pacid=30774315 transcript=Cre07.g337650.t1.2 locus=Cre07.g337650 ID=Cre07.g337650.t1.2.v5.5 annot-version=v5.5	5
22.6972	22.9664	18	27.7843	27.5761	28.3032	22.8299	24.1826	18	27.1149	27.5709	27.697		34.993	0	39.219	1	2	0	6	8	7	6800600	8195500	0	231160000	200100000	331209984	7455700	19041000	0	145340000	199370000	217590000	0.0148802	0.00478788	-6.66667	-3.13445	0.0372215	0.0067541	-5.79008	-2.4279	Cre12.g498550.t1.1	Cre12.g498550.t1.1	>Cre12.g498550.t1.1 pacid=30791717 transcript=Cre12.g498550.t1.1 locus=Cre12.g498550 ID=Cre12.g498550.t1.1.v5.5 annot-version=v5.5	8
18	22.4973	22.4153	27.7974	27.4109	27.6235	18	23.6189	22.7853	27.1702	27.2339	27.3615		55.054	0	78.606	0	1	1	6	6	5	0	5920700	5593600	233270000	178440000	206770000	0	12882000	7228600	151020000	157840000	172440000	0.0111891	0.0041875	-6.63969	-3.3368	0.0298207	0.00692437	-5.78714	-2.5703	Cre12.g523850.t1.2	Cre12.g523850.t1.2	>Cre12.g523850.t1.2 pacid=30792125 transcript=Cre12.g523850.t1.2 locus=Cre12.g523850 ID=Cre12.g523850.t1.2.v5.5 annot-version=v5.5	6
22.7734	23.1945	21.6096	28.5297	28.1908	29.722	21.8746	23.9027	22.11	28.0315	27.5654	29.4545		47.178	0	121.98	2	1	1	11	12	15	7169400	9599600	3200000	387520000	306400000	885529984	3845000	15683000	4526600	274360000	198610000	735680000	0.000691561	0	-6.2883	-5.40462	0.00260697	0.00311111	-5.72137	-4.21885	Cre12.g510050.t1.2;Cre07.g346050.t2.1;Cre07.g346050.t1.2	Cre12.g510050.t1.2	>Cre12.g510050.t1.2 pacid=30792531 transcript=Cre12.g510050.t1.2 locus=Cre12.g510050 ID=Cre12.g510050.t1.2.v5.5 annot-version=v5.5	15
18	18	18	24.4561	24.269	23.3835	18	18	18	23.765	24.2752	22.9501		41.446	0	4.1959	0	0	0	1	1	2	0	0	0	23016000	20216000	10943000	0	0	0	14255000	20303000	8103700	5.30491e-05	0	-6.03621	-7.26559	0.000125381	0.00213793	-5.66343	-6.39315	Cre03.g185550.t1.2	Cre03.g185550.t1.2	>Cre03.g185550.t1.2 pacid=30788192 transcript=Cre03.g185550.t1.2 locus=Cre03.g185550 ID=Cre03.g185550.t1.2.v5.5 annot-version=v5.5	2
24.3883	24.1704	22.8071	29.7806	29.3845	30.0654	23.8566	24.8557	22.8367	29.1341	29.3384	29.6995		35.093	0	216.6	3	3	1	11	11	12	21959000	18881000	7338500	922259968	700840000	1123500032	15190000	30360000	7490700	589169984	678790016	871830016	0.0003646	0	-5.95489	-5.76624	0.000793146	0.00177143	-5.541	-5.01073	Cre15.g635850.t2.1;Cre15.g635850.t1.2	Cre15.g635850.t2.1;Cre15.g635850.t1.2	>Cre15.g635850.t2.1 pacid=30783653 transcript=Cre15.g635850.t2.1 locus=Cre15.g635850 ID=Cre15.g635850.t2.1.v5.5 annot-version=v5.5;>Cre15.g635850.t1.2 pacid=30783652 transcript=Cre15.g635850.t1.2 locus=Cre15.g635850 ID=Cre15.g635850.t1.2.v5.5 annot-version	12
18	18	18	23.6607	22.8968	24.7519	18	18	18	23.0145	23.9348	23.5717		68.394	0	14.574	0	0	0	2	1	3	0	0	0	13261000	7809600	28253000	0	0	0	8473200	16036000	12468000	0.000429318	0	-5.7698	-5.55703	3.29531e-05	0	-5.507	-7.17393	Cre10.g461050.t1.2	Cre10.g461050.t1.2	>Cre10.g461050.t1.2 pacid=30790304 transcript=Cre10.g461050.t1.2 locus=Cre10.g461050 ID=Cre10.g461050.t1.2.v5.5 annot-version=v5.5	3
18	18	18	21.9326	22.9156	25.8763	18	18	18	21.6144	23.4255	25.3087		79.655	0	8.4278	0	0	0	1	2	5	0	0	0	4002900	7911700	61593000	0	0	0	3210500	11266000	41559000	0.00928283	0.00415504	-5.57481	-3.30811	0.006936	0.00558333	-5.4495	-3.47873	Cre02.g120250.t2.1;Cre02.g120250.t1.1	Cre02.g120250.t2.1;Cre02.g120250.t1.1	>Cre02.g120250.t2.1 pacid=30785281 transcript=Cre02.g120250.t2.1 locus=Cre02.g120250 ID=Cre02.g120250.t2.1.v5.5 annot-version=v5.5;>Cre02.g120250.t1.1 pacid=30785280 transcript=Cre02.g120250.t1.1 locus=Cre02.g120250 ID=Cre02.g120250.t1.1.v5.5 annot-version	5
18	18	18	23.3988	23.9633	24.1592	18	18	18	22.5925	23.9363	23.8165		27.168	0	46.946	0	0	0	2	2	2	0	0	0	11060000	16356000	18735000	0	0	0	6324500	16053000	14773000	1.37792e-05	0	-5.84047	-8.02331	0.00022211	0.00206667	-5.44844	-5.86259	Cre08.g358540.t1.1	Cre08.g358540.t1.1	>Cre08.g358540.t1.1 pacid=30773410 transcript=Cre08.g358540.t1.1 locus=Cre08.g358540 ID=Cre08.g358540.t1.1.v5.5 annot-version=v5.5	2
18	18	19.9065	26.026	25.6863	26.3809	18	18	23.4399	24.3578	25.6272	25.4883		46.857	0	29.156	0	0	1	4	3	5	0	0	982750	68330000	53996000	87387000	0	0	11379000	21500000	51826000	47070000	0.000374955	0	-7.39561	-6.34068	0.0451248	0.00629008	-5.34448	-2.26719	Cre07.g331500.t1.1	Cre07.g331500.t1.1	>Cre07.g331500.t1.1 pacid=30774567 transcript=Cre07.g331500.t1.1 locus=Cre07.g331500 ID=Cre07.g331500.t1.1.v5.5 annot-version=v5.5	5
24.7816	24.6769	23.4197	30.653	30.181	30.8026	24.3832	26.3286	23.7801	30.0407	30.076	30.3886		45.029	0	323.31	3	2	1	23	23	25	28840000	26822000	11221000	1688400000	1217299968	1872899968	21881000	84274000	14405000	1104499968	1131800064	1405699968	0.000193887	0	-6.25283	-6.40683	0.00235019	0.00307317	-5.33784	-4.18043	Cre04.g229300.t1.1	Cre04.g229300.t1.1	>Cre04.g229300.t1.1 pacid=30791545 transcript=Cre04.g229300.t1.1 locus=Cre04.g229300 ID=Cre04.g229300.t1.1.v5.5 annot-version=v5.5	25
18	18	18	23.403	23.0804	23.9741	18	18	18	22.7118	23.0866	23.5407		27.831	0	2.7242	0	0	0	1	2	1	0	0	0	11092000	8869200	16479000	0	0	0	6869700	8907300	12203000	3.04256e-05	0	-5.48584	-7.20582	2.85392e-05	0	-5.11304	-6.91274	Cre48.g761197.t1.1	Cre48.g761197.t1.1	>Cre48.g761197.t1.1 pacid=30778371 transcript=Cre48.g761197.t1.1 locus=Cre48.g761197 ID=Cre48.g761197.t1.1.v5.5 annot-version=v5.5	2
24.1979	23.0395	21.3695	28.3596	28.3124	29.311	23.7996	24.1284	21.7343	27.7476	28.3767	28.8339		49.589	0	198.28	3	2	1	8	9	11	19244000	8621400	2709300	344430016	333340000	666040000	14601000	18339000	3488800	225350000	348540000	478500000	0.00279417	0.00319266	-5.79207	-4.18795	0.00329574	0.00390909	-5.09867	-3.88395	Cre12.g509750.t1.2	Cre12.g509750.t1.2	>Cre12.g509750.t1.2 pacid=30791961 transcript=Cre12.g509750.t1.2 locus=Cre12.g509750 ID=Cre12.g509750.t1.2.v5.5 annot-version=v5.5	11
23.9466	23.3355	21.7284	29.2062	28.472	28.9885	23.6247	24.2963	22.3188	28.7467	27.8443	28.8169		32.439	0	50.58	1	1	1	8	8	7	16168000	10585000	3474600	619369984	372340000	532609984	12934000	20602000	5231600	450409984	240980000	472870016	0.00107407	0.00241758	-5.8854	-4.91919	0.00155714	0.00315	-5.05603	-4.36011	Cre02.g088900.t1.2	Cre02.g088900.t1.2	>Cre02.g088900.t1.2 pacid=30785043 transcript=Cre02.g088900.t1.2 locus=Cre02.g088900 ID=Cre02.g088900.t1.2.v5.5 annot-version=v5.5	9
32.1153	32.0916	32.0725	37.8202	37.7416	37.8556	31.7838	33.3715	31.9405	36.9771	37.6645	37.4037		26.906	0	323.31	13	13	12	25	25	25	4652199936	4576399872	4516199936	242669993984	229809995776	248699994112	3697299968	11112999936	4121299968	135269998592	217839992832	181819998208	9.33276e-09	0	-5.71273	-10.6605	0.000785369	0.00165333	-4.98315	-4.77569	Cre06.g251716.t1.1	Cre06.g251716.t1.1	>Cre06.g251716.t1.1 pacid=30778977 transcript=Cre06.g251716.t1.1 locus=Cre06.g251716 ID=Cre06.g251716.t1.1.v5.5 annot-version=v5.5	25
18	18.9063	19.6441	25.406	25.2123	26.8727	18	21.5153	21.2966	24.0632	25.0978	26.5911		52.873	0	200.67	0	1	1	4	4	6	0	491330	819350	44459000	38874000	122880000	0	2997500	2575800	17528000	35909000	101090000	0.0005927	0	-6.98017	-5.77984	0.0212031	0.00722807	-4.98005	-2.68719	Cre16.g656400.t1.2	Cre16.g656400.t1.2	>Cre16.g656400.t1.2 pacid=30778098 transcript=Cre16.g656400.t1.2 locus=Cre16.g656400 ID=Cre16.g656400.t1.2.v5.5 annot-version=v5.5	6
25.4325	25.6262	24.406	30.4157	29.773	30.8214	24.3981	26.4806	24.0636	29.4742	29.355	30.7547		55.608	0	192.28	5	5	3	22	18	21	45285000	51791000	22230000	1432300032	917400000	1897400064	22109000	93637000	17533000	745779968	686670016	1811699968	0.000439348	0	-5.18177	-5.2537	0.00514601	0.00589011	-4.88055	-3.53953	Cre01.g050950.t1.2	Cre01.g050950.t1.2	>Cre01.g050950.t1.2 pacid=30789075 transcript=Cre01.g050950.t1.2 locus=Cre01.g050950 ID=Cre01.g050950.t1.2.v5.5 annot-version=v5.5	22
27.8903	28.2177	27.1237	33.8782	33.3945	33.7289	27.8662	29.7587	27.6859	33.1208	33.3691	33.3465		27.565	0	323.31	5	5	4	7	7	7	248780000	312150016	146230000	15788999680	11290999808	14236999680	244660000	908350016	215910000	9340199936	11093999616	10922000384	7.50293e-05	0	-5.92332	-6.93329	0.00191933	0.00303614	-4.84189	-4.14669	Cre01.g066917.t1.1	Cre01.g066917.t1.1	>Cre01.g066917.t1.1 pacid=30788321 transcript=Cre01.g066917.t1.1 locus=Cre01.g066917 ID=Cre01.g066917.t1.1.v5.5 annot-version=v5.5	7
22.2316	21.0929	18	26.5254	26.2774	26.9719	22.7248	23.1382	18	25.4855	25.8187	26.9309		46.219	0	22.523	1	1	0	5	5	5	4924700	2236600	0	96592000	81338000	131630000	6931700	9232100	0	46977000	59184000	127940000	0.00862898	0.00354839	-6.15009	-3.45422	0.0483364	0.00624242	-4.79068	-2.17254	Cre14.g619100.t1.2	Cre14.g619100.t1.2	>Cre14.g619100.t1.2 pacid=30776241 transcript=Cre14.g619100.t1.2 locus=Cre14.g619100 ID=Cre14.g619100.t1.2.v5.5 annot-version=v5.5	5
26.1566	27.0558	24.9743	31.7912	31.3385	32.1175	25.9249	28.4852	25.4798	31.159	31.4286	31.5258		64.459	0	323.31	7	11	4	27	26	30	74803000	139510000	32961000	3716199936	2715399936	4659299840	63705000	375740000	46793000	2397700096	2890400000	3091800064	0.000905916	0.00247191	-5.68684	-4.97249	0.00734132	0.00632	-4.74119	-3.28595	Cre12.g514200.t1.2	Cre12.g514200.t1.2	>Cre12.g514200.t1.2 pacid=30791786 transcript=Cre12.g514200.t1.2 locus=Cre12.g514200 ID=Cre12.g514200.t1.2.v5.5 annot-version=v5.5	30
18	18	18	24.0444	22.3773	22.6644	18	18	18	22.8806	22.7755	22.5658		21.705	0	3.7814	0	0	0	3	2	2	0	0	0	17302000	5448200	6647400	0	0	0	7722200	7179500	6208500	0.000614318	0.00244444	-5.02871	-4.95647	8.68268e-07	0	-4.74062	-8.00077	Cre07.g321300.t1.2	Cre07.g321300.t1.2	>Cre07.g321300.t1.2 pacid=30775021 transcript=Cre07.g321300.t1.2 locus=Cre07.g321300 ID=Cre07.g321300.t1.2.v5.5 annot-version=v5.5	3
23.4472	24.0863	22.8601	28.6013	28.2003	28.7361	22.6059	24.6502	23.0242	28.012	27.9074	28.5016		77.546	0	124.82	2	3	2	12	11	14	11437000	17811000	7613600	407240000	308409984	447129984	6383400	26330000	8530300	270670016	251750000	380049984	0.00020327	0	-5.04803	-5.67889	0.00191834	0.003	-4.71358	-4.09923	Cre12.g485800.t1.2	Cre12.g485800.t1.2	>Cre12.g485800.t1.2 pacid=30791981 transcript=Cre12.g485800.t1.2 locus=Cre12.g485800 ID=Cre12.g485800.t1.2.v5.5 annot-version=v5.5	15
18	18	18	22.1712	23.6448	22.4842	18	18	18	23.0572	22.8643	21.9599		22.121	0	28.897	0	0	0	1	2	2	0	0	0	4722800	13116000	5867200	0	0	0	8727700	7635600	4079200	0.000442699	0.00252874	-4.76676	-5.02698	0.000165389	0.00196825	-4.62711	-5.52002	Cre12.g517400.t1.2	Cre12.g517400.t1.2	>Cre12.g517400.t1.2 pacid=30793302 transcript=Cre12.g517400.t1.2 locus=Cre12.g517400 ID=Cre12.g517400.t1.2.v5.5 annot-version=v5.5	2
28.1434	27.7904	25.3918	33.2391	33.0308	33.213	27.9462	29.5758	26.8465	32.6367	32.7443	32.7028		30.714	0	323.31	8	7	4	16	16	18	296489984	232130000	44023000	10138000384	8775400448	9956299776	258610000	800209984	120670000	6677899776	7194599936	6990799872	0.00221357	0.00341176	-6.05244	-4.42791	0.00450117	0.00582609	-4.57178	-3.53459	Cre16.g673650.t1.1	Cre16.g673650.t1.1	>Cre16.g673650.t1.1 pacid=30777655 transcript=Cre16.g673650.t1.1 locus=Cre16.g673650 ID=Cre16.g673650.t1.1.v5.5 annot-version=v5.5	19
25.6244	24.2897	24.6671	29.6174	30.008	29.5329	24.9398	25.0799	24.5626	28.9927	30.1198	28.9632		24.228	0	46.236	1	1	1	7	7	6	51725000	20508000	26641000	823600000	1079699968	776739968	32183000	35466000	24779000	534160000	1166700032	523350016	0.000328825	0	-4.85901	-5.26255	0.000395482	0.00172222	-4.49778	-4.93798	Cre03.g164000.t1.2	Cre03.g164000.t1.2	>Cre03.g164000.t1.2 pacid=30787251 transcript=Cre03.g164000.t1.2 locus=Cre03.g164000 ID=Cre03.g164000.t1.2.v5.5 annot-version=v5.5	7
18	18	18	22.7069	22.2842	23.2116	18	18	18	22.0409	22.1782	22.8389		106.99	0	1.6731	0	0	0	1	2	1	0	0	0	6846400	5107500	9713700	0	0	0	4314900	4745700	7502200	6.03809e-05	0	-4.73423	-6.16383	6.0247e-05	0.00203279	-4.35266	-5.83214	Cre06.g278255.t1.1	Cre06.g278255.t1.1	>Cre06.g278255.t1.1 pacid=30778742 transcript=Cre06.g278255.t1.1 locus=Cre06.g278255 ID=Cre06.g278255.t1.1.v5.5 annot-version=v5.5	2
23.7806	22.7529	23.7469	22.19	22.0825	24.0988	18	18	18	21.4454	21.7403	23.7764		72.106	0	3.6942	1	1	1	2	1	1	14410000	7068000	14078000	4784600	4441200	17966000	0	0	0	2855600	3503400	14368000	0.436338	0.654514	0.636375	0.514627	0.00413882	0.00570213	-4.32068	-3.50477	Cre01.g043350.t1.2	Cre01.g043350.t1.2	>Cre01.g043350.t1.2 pacid=30789542 transcript=Cre01.g043350.t1.2 locus=Cre01.g043350 ID=Cre01.g043350.t1.2.v5.5 annot-version=v5.5	3
18	18	18	21.5448	22.8698	23.2093	18	18	18	22.0928	23.104	21.6476		48.623	0	14.59	0	0	0	1	1	2	0	0	0	3059300	7664500	9698400	0	0	0	4473100	9015600	3285300	0.000864707	0.00355102	-4.54128	-4.5061	0.00057599	0.00163158	-4.28148	-4.59941	Cre16.g666050.t1.2	Cre16.g666050.t1.2	>Cre16.g666050.t1.2 pacid=30777336 transcript=Cre16.g666050.t1.2 locus=Cre16.g666050 ID=Cre16.g666050.t1.2.v5.5 annot-version=v5.5	2
26.998	27.1246	25.3073	32.3954	31.6797	32.6698	27.1918	29.2301	26.2195	31.3928	31.7597	32.083		25.921	0	323.31	6	6	5	12	11	11	134030000	146320000	41521000	5649200128	3439899904	6832500224	153300000	629689984	78137000	2819599872	3635899904	4549300224	0.000920146	0.0025	-5.77167	-4.99313	0.00990025	0.00762963	-4.19805	-2.97908	Cre06.g272650.t1.2	Cre06.g272650.t1.2	>Cre06.g272650.t1.2 pacid=30779881 transcript=Cre06.g272650.t1.2 locus=Cre06.g272650 ID=Cre06.g272650.t1.2.v5.5 annot-version=v5.5	12
26.4771	26.5911	25.7512	31.724	31.5096	31.9684	26.811	28.3493	26.4771	30.8355	31.4706	31.5238		28.702	0	323.31	4	5	4	11	11	12	93413000	101090000	56480000	3547000064	3057200128	4201799936	117740000	341969984	93415000	1916099968	2975800064	3087500032	4.97996e-05	0	-5.46082	-6.87307	0.00275839	0.00488889	-4.06416	-3.63697	Cre10.g452050.t1.2	Cre10.g452050.t1.2	>Cre10.g452050.t1.2 pacid=30790835 transcript=Cre10.g452050.t1.2 locus=Cre10.g452050 ID=Cre10.g452050.t1.2.v5.5 annot-version=v5.5	12
27.8105	27.8535	26.9913	32.6172	32.485	32.9083	27.9114	29.4757	27.6998	32.0227	32.4361	32.3961		28.687	0	323.31	6	5	5	9	8	9	235400000	242520000	133410000	6587899904	6011100160	8061000192	252450000	746590016	218010000	4362999808	5810800128	5651999744	7.59551e-05	0	-5.11837	-6.34145	0.00241885	0.00494382	-3.92263	-3.6479	Cre03.g156900.t1.2	Cre03.g156900.t1.2	>Cre03.g156900.t1.2 pacid=30787808 transcript=Cre03.g156900.t1.2 locus=Cre03.g156900 ID=Cre03.g156900.t1.2.v5.5 annot-version=v5.5	9
18	18	18	22.5851	20.7679	23.1014	18	18	18	21.6487	21.6264	22.4748		60.072	0	20.554	0	0	0	2	1	2	0	0	0	6292000	1785500	8999500	0	0	0	3287900	3237500	5828900	0.00421573	0.004288	-4.15147	-3.43761	0.000149698	0.0017971	-3.91666	-5.02689	Cre09.g400050.t1.1	Cre09.g400050.t1.1	>Cre09.g400050.t1.1 pacid=30780669 transcript=Cre09.g400050.t1.1 locus=Cre09.g400050 ID=Cre09.g400050.t1.1.v5.5 annot-version=v5.5	2
25.7358	25.1208	24.2296	30.0439	29.8544	30.5111	25.8894	26.8397	24.782	29.0949	30.1348	29.9217		29.207	0	323.31	6	5	3	17	18	19	55879000	36484000	19671000	1106899968	970680000	1530200064	62158000	120100000	28848000	573390016	1178899968	1017000000	0.000437374	0	-5.10775	-5.21834	0.00451255	0.00638384	-3.88011	-3.30542	Cre16.g672650.t1.2	Cre16.g672650.t1.2	>Cre16.g672650.t1.2 pacid=30778052 transcript=Cre16.g672650.t1.2 locus=Cre16.g672650 ID=Cre16.g672650.t1.2.v5.5 annot-version=v5.5	19
27.81	27.4141	27.37	32.8011	32.497	33.3597	28.2633	29.3369	28.2069	32.0252	32.4435	32.9182		28.228	0	323.31	7	8	5	14	14	14	235320000	178840000	173460000	7483700224	6061400064	11022000128	322180000	678070016	309830016	4370800128	5840799744	8116199936	4.97857e-05	0	-5.35454	-6.78845	0.00100668	0.00296471	-3.85996	-4.06707	Cre10.g425900.t1.2	Cre10.g425900.t1.2	>Cre10.g425900.t1.2 pacid=30790196 transcript=Cre10.g425900.t1.2 locus=Cre10.g425900 ID=Cre10.g425900.t1.2.v5.5 annot-version=v5.5	15
28.6545	28.8382	28.9648	33.0068	32.9411	33.3029	28.0466	29.8897	28.6235	32.2303	32.995	32.8931		40.304	0	323.31	13	12	11	28	28	28	422529984	479929984	523920000	8630400000	8246199808	10597000192	277240000	994739968	413540000	5038499840	8560300032	7976200192	7.56863e-06	0	-4.26443	-6.6302	0.00292702	0.00576344	-3.85289	-3.5193	Cre01.g010900.t1.2	Cre01.g010900.t1.2	>Cre01.g010900.t1.2 pacid=30788366 transcript=Cre01.g010900.t1.2 locus=Cre01.g010900 ID=Cre01.g010900.t1.2.v5.5 annot-version=v5.5	29
26.8182	26.7304	25.7372	31.1059	31.7213	31.7506	27.2083	28.5275	26.405	30.4382	31.6806	31.2551		28.886	0	323.31	3	4	5	9	8	9	118330000	111340000	55933000	2311000064	3540600064	3613199872	155060000	386940000	88861000	1454800000	3441999872	2562899968	0.000230248	0	-5.09734	-5.62996	0.00645359	0.00613592	-3.74436	-3.07387	Cre11.g467573.t1.1	Cre11.g467573.t1.1	>Cre11.g467573.t1.1 pacid=30776039 transcript=Cre11.g467573.t1.1 locus=Cre11.g467573 ID=Cre11.g467573.t1.1.v5.5 annot-version=v5.5	9
24.6823	23.2415	22.5807	29.1851	28.6223	28.3484	24.5534	25.5911	23.8793	28.3834	28.6388	27.8633		49.021	0	163.06	3	2	2	12	10	12	26922000	9917200	6273100	610369984	413200000	341750016	24622000	50545000	15431000	350150016	417960000	244160000	0.00144666	0.00344554	-5.21707	-4.46845	0.00271357	0.00552577	-3.62053	-3.4559	Cre09.g416050.t1.2	Cre09.g416050.t1.2	>Cre09.g416050.t1.2 pacid=30780467 transcript=Cre09.g416050.t1.2 locus=Cre09.g416050 ID=Cre09.g416050.t1.2.v5.5 annot-version=v5.5	12
28.833	29.0675	28.365	33.669	33.0663	33.688	28.8282	30.6933	28.8966	32.9343	33.1123	33.1313		27.38	0	323.31	3	3	3	3	3	3	478200000	562579968	345720000	13658000384	8994100224	13838999552	476609984	1736199936	499729984	8207300096	9285300224	9408600064	8.385e-05	0	-4.71928	-5.97106	0.00427791	0.00625743	-3.5866	-3.22006	Cre04.g232104.t1.1	Cre04.g232104.t1.1	>Cre04.g232104.t1.1 pacid=30791553 transcript=Cre04.g232104.t1.1 locus=Cre04.g232104 ID=Cre04.g232104.t1.1.v5.5 annot-version=v5.5	3
27.8318	28.2385	27.7349	33.5099	33.1027	33.3514	29.1959	30.6944	28.3504	32.6082	33.0249	32.8461		26.222	0	323.31	4	5	6	13	12	13	238890000	316689984	223370000	12231999488	9223499776	10958999552	614940032	1737600000	342230016	6546899968	8739399680	7720800256	1.01253e-05	0	-5.38629	-7.75501	0.0080206	0.00749091	-3.41282	-2.85372	Cre16.g687900.t1.2	Cre16.g687900.t1.2	>Cre16.g687900.t1.2 pacid=30778224 transcript=Cre16.g687900.t1.2 locus=Cre16.g687900 ID=Cre16.g687900.t1.2.v5.5 annot-version=v5.5	13
27.4904	27.2496	27.1737	32.4854	32.4527	31.954	28.0369	29.3048	28.1914	31.7265	32.4321	31.4665		13.223	0	53.653	2	2	2	4	4	4	188560000	159570000	151390000	6012800000	5878000128	4160100096	275390016	663160000	306510016	3553299968	5794800128	2967300096	1.42999e-05	0	-4.99276	-7.16653	0.00240571	0.00546939	-3.36403	-3.38888	Cre12.g560950.t1.2	Cre12.g560950.t1.2	>Cre12.g560950.t1.2 pacid=30792049 transcript=Cre12.g560950.t1.2 locus=Cre12.g560950 ID=Cre12.g560950.t1.2.v5.5 annot-version=v5.5	4
26.4833	27.3245	25.6991	31.1564	30.9928	31.3717	27.0212	29.2464	26.4498	30.48	30.9707	30.7749		22.844	0	323.31	2	4	3	11	9	8	93814000	168070000	54477000	2393299968	2136800000	2778500096	136200000	636880000	91661000	1497600000	2104300032	1837200000	0.000634138	0.00234043	-4.6713	-4.75719	0.0214976	0.00648819	-3.16939	-2.32203	Cre07.g344950.t1.2	Cre07.g344950.t1.2	>Cre07.g344950.t1.2 pacid=30774737 transcript=Cre07.g344950.t1.2 locus=Cre07.g344950 ID=Cre07.g344950.t1.2.v5.5 annot-version=v5.5	11
21.8567	21.4352	22.537	27.7041	27.3659	28.0036	23.2169	23.7594	23.7956	25.5852	28.4301	26.2207		40.863	0	37.443	1	1	1	9	6	8	3797600	2835500	6085800	218660000	172970000	269110016	9749300	14200000	14561000	50340000	361680000	78203000	0.000100296	0	-5.74828	-6.6066	0.0232528	0.0064375	-3.15473	-2.28236	Cre02.g142146.t1.1	Cre02.g142146.t1.1	>Cre02.g142146.t1.1 pacid=30785153 transcript=Cre02.g142146.t1.1 locus=Cre02.g142146 ID=Cre02.g142146.t1.1.v5.5 annot-version=v5.5	9
28.5042	28.3605	27.5152	32.656	32.5882	33.1524	28.984	30.1634	28.6668	31.9715	32.5301	32.65		27.781	0	323.31	10	11	10	18	15	17	380729984	344640000	191820000	6767799808	6457099776	9546999808	530950016	1202499968	426140000	4211000064	6202200064	6739400192	0.000194866	0	-4.67226	-5.45756	0.00341652	0.00619608	-3.11249	-3.10934	Cre06.g278213.t1.1	Cre06.g278213.t1.1	>Cre06.g278213.t1.1 pacid=30779171 transcript=Cre06.g278213.t1.1 locus=Cre06.g278213 ID=Cre06.g278213.t1.1.v5.5 annot-version=v5.5	18
27.9903	27.5546	26.7296	32.1243	32.519	32.1339	28.4565	29.6425	28.093	31.2352	32.4882	31.2634		23.9	0	200.78	4	4	3	6	6	5	266640000	197130000	111280000	4681399808	6154500096	4712699904	368360000	838080000	286310016	2527699968	6024399872	2577700096	0.000248068	0	-4.83423	-5.4204	0.00932582	0.00698305	-2.93158	-2.60799	Cre06.g283050.t1.2	Cre06.g283050.t1.2	>Cre06.g283050.t1.2 pacid=30779127 transcript=Cre06.g283050.t1.2 locus=Cre06.g283050 ID=Cre06.g283050.t1.2.v5.5 annot-version=v5.5	6
25.3639	26.601	25.9543	29.9228	29.3702	30.1552	25.8698	27.7288	26.5889	29.3729	29.0791	29.8807		63.161	0	206.27	1	3	2	22	18	21	43182000	101790000	65015000	1017800000	693900032	1195699968	61316000	222430000	100940000	695230016	567129984	988529984	0.000839416	0.00316364	-3.84298	-4.14823	0.00999854	0.00686667	-2.71509	-2.49162	Cre07.g340350.t1.1	Cre07.g340350.t1.1	>Cre07.g340350.t1.1 pacid=30774678 transcript=Cre07.g340350.t1.1 locus=Cre07.g340350 ID=Cre07.g340350.t1.1.v5.5 annot-version=v5.5	24
29.2694	29.9327	28.4813	33.0108	32.9622	33.2036	29.4625	31.4395	29.3724	32.3276	32.9249	32.7003		26.686	0	323.31	4	5	3	7	7	6	647110016	1024800000	374740000	8654199808	8367900160	9891600384	739779968	2912300032	694990016	5389700096	8154500096	6978699776	0.000845731	0.00313514	-3.83103	-4.13754	0.021317	0.0061037	-2.55946	-2.13885	Cre12.g548950.t1.2;Cre12.g548400.t1.2	Cre12.g548950.t1.2;Cre12.g548400.t1.2	>Cre12.g548950.t1.2 pacid=30793494 transcript=Cre12.g548950.t1.2 locus=Cre12.g548950 ID=Cre12.g548950.t1.2.v5.5 annot-version=v5.5;>Cre12.g548400.t1.2 pacid=30793460 transcript=Cre12.g548400.t1.2 locus=Cre12.g548400 ID=Cre12.g548400.t1.2.v5.5 annot-version	7
31.5956	32.3126	31.7398	35.3765	35.4748	35.7768	31.7179	33.8212	32.1554	34.7027	35.3657	35.1613		26.96	0	323.31	9	10	8	12	13	13	3244999936	5334199808	3586099968	44606001152	47750000640	58868998144	3532199936	15176999936	4783600128	27960999936	44273999872	38425001984	0.000126467	0.0023913	-3.66004	-4.88063	0.0199717	0.00619549	-2.51174	-2.14669	Cre06.g285250.t1.2	Cre06.g285250.t1.2	>Cre06.g285250.t1.2 pacid=30779463 transcript=Cre06.g285250.t1.2 locus=Cre06.g285250 ID=Cre06.g285250.t1.2.v5.5 annot-version=v5.5	13
26.1332	26.4361	25.3781	29.751	29.7292	29.4202	26.409	28.1866	25.6	29.0012	29.7113	28.839		23.995	0	115.72	3	3	3	7	8	7	73602000	90796000	43607000	903550016	889960000	718380032	89103000	305500000	50858000	537299968	879020032	480180000	0.000389717	0.00337864	-3.65098	-4.3869	0.0388255	0.0100414	-2.45198	-1.87238	Cre11.g467569.t1.1	Cre11.g467569.t1.1	>Cre11.g467569.t1.1 pacid=30775882 transcript=Cre11.g467569.t1.1 locus=Cre11.g467569 ID=Cre11.g467569.t1.1.v5.5 annot-version=v5.5	8
24.5813	24.6322	24.499	29.2604	28.935	28.997	25.8804	26.5915	25.9198	28.245	28.9424	28.4822		20.284	0	285.36	1	1	1	4	3	3	25102000	26003000	23710000	643089984	513230016	535760000	61771000	101120000	63479000	318120000	515849984	374969984	1.9249e-06	0	-4.49334	-7.40206	0.00141266	0.00770093	-2.42596	-3.00069	Cre12.g486300.t1.2	Cre12.g486300.t1.2	>Cre12.g486300.t1.2 pacid=30793364 transcript=Cre12.g486300.t1.2 locus=Cre12.g486300 ID=Cre12.g486300.t1.2.v5.5 annot-version=v5.5	4
29.5972	29.0374	28.335	32.7131	32.3677	32.6521	29.736	30.7206	29.0853	31.8371	32.4414	32.1109		24.057	0	323.31	7	7	7	10	10	10	812150016	550960000	338590016	7040799744	5541799936	6749199872	894179968	1769400064	569580032	3836499968	5832200192	4638000128	0.000704139	0.00310714	-3.58779	-4.07547	0.0107639	0.00633846	-2.28249	-2.26793	Cre09.g412100.t1.2	Cre09.g412100.t1.2	>Cre09.g412100.t1.2 pacid=30780717 transcript=Cre09.g412100.t1.2 locus=Cre09.g412100 ID=Cre09.g412100.t1.2.v5.5 annot-version=v5.5	10
25.5455	25.793	26.2128	29.7914	29.4509	29.91	26.2951	27.7439	27.1116	29.231	29.1844	29.3141		22.479	0	323.31	3	2	3	11	10	9	48975000	58138000	77773000	929180032	733859968	1008800000	82341000	224780000	145010000	630089984	610089984	667440000	8.45723e-05	0	-3.86701	-5.23674	0.00648057	0.006592	-2.19296	-2.38086	Cre11.g481450.t1.2	Cre11.g481450.t1.2	>Cre11.g481450.t1.2 pacid=30775475 transcript=Cre11.g481450.t1.2 locus=Cre11.g481450 ID=Cre11.g481450.t1.2.v5.5 annot-version=v5.5	11
29.5893	29.245	29.3664	33.1992	32.1875	33.2844	29.7573	31.1421	29.8994	32.3588	32.2671	32.7154		26.922	0	316.45	7	8	8	13	13	14	807750016	636220032	692089984	9861499904	4891100160	10462000128	907470016	2369700096	1001400000	5507800064	5168399872	7051899904	0.000678465	0.00307965	-3.49015	-4.02815	0.00907119	0.0063876	-2.18085	-2.27033	Cre12.g508750.t1.2	Cre12.g508750.t1.2	>Cre12.g508750.t1.2 pacid=30791684 transcript=Cre12.g508750.t1.2 locus=Cre12.g508750 ID=Cre12.g508750.t1.2.v5.5 annot-version=v5.5	14
27.8648	27.353	27.3608	30.7975	30.7049	31.2697	28.001	28.7793	28.3437	30.1312	30.9073	30.492		14.151	0	198.49	4	5	4	10	9	9	244420000	171430000	172360000	1866200064	1750200064	2588900096	268620000	460729984	340640000	1176000000	2013900032	1510099968	0.000152765	0.00358763	-3.39778	-4.57052	0.00255424	0.00704274	-2.13552	-2.61127	Cre07.g330250.t1.2	Cre07.g330250.t1.2	>Cre07.g330250.t1.2 pacid=30775443 transcript=Cre07.g330250.t1.2 locus=Cre07.g330250 ID=Cre07.g330250.t1.2.v5.5 annot-version=v5.5	10
30.2189	29.703	29.7125	32.957	33.0254	34.2581	30.4858	31.9907	30.439	32.2369	32.9311	33.6252		29.938	0	323.31	14	13	14	22	24	24	1249699968	873990016	879750016	8337500160	8742400000	20546000896	1503600000	4267399936	1455600000	5061400064	8189599744	13249000448	0.00148933	0.00297436	-3.53533	-3.69869	0.0390859	0.0168627	-1.95925	-1.70618	Cre17.g720250.t1.2	Cre17.g720250.t1.2	>Cre17.g720250.t1.2 pacid=30782643 transcript=Cre17.g720250.t1.2 locus=Cre17.g720250 ID=Cre17.g720250.t1.2.v5.5 annot-version=v5.5	25
24.2304	23.3681	22.4749	27.6068	26.6724	27.2293	24.8802	25.4935	24.2117	26.9594	26.7277	26.0589		24.308	0	62.534	2	1	1	5	3	4	19682000	10827000	5829400	204400000	106950000	157340000	30881000	47239000	19429000	130490000	111130000	69905000	0.00268443	0.00292437	-3.81169	-3.54614	0.019863	0.0113243	-1.72018	-1.79537	Cre01.g037850.t1.1	Cre01.g037850.t1.1	>Cre01.g037850.t1.1 pacid=30788900 transcript=Cre01.g037850.t1.1 locus=Cre01.g037850 ID=Cre01.g037850.t1.1.v5.5 annot-version=v5.5	5
26.7416	26.5457	26.7945	29.0245	28.9475	29.7745	26.6178	27.723	27.6597	28.2917	28.9886	29.3187		38.76	0	62.197	7	7	7	11	9	11	112210000	97960000	116400000	546049984	517689984	918390016	102980000	221540000	212030000	328590016	532649984	669600000	0.000740781	0.00412308	-2.55489	-3.29907	0.0308505	0.0421429	-1.53286	-1.58179	Cre06.g259900.t1.2	Cre06.g259900.t1.2	>Cre06.g259900.t1.2 pacid=30779752 transcript=Cre06.g259900.t1.2 locus=Cre06.g259900 ID=Cre06.g259900.t1.2.v5.5 annot-version=v5.5	11
26.327	26.3794	26.7353	28.8346	28.2723	30.2863	27.2189	27.7325	27.2091	28.8418	28.3407	29.4316		61.514	0	48.624	4	5	6	11	12	13	84183000	87298000	111720000	478720000	324190016	1309400064	156210000	223000000	155150000	481110016	339929984	724089984	0.0124482	0.00876316	-2.65045	-2.3802	0.0145067	0.0141987	-1.48453	-1.72711	Cre02.g116750.t2.1;Cre02.g116750.t1.1	Cre02.g116750.t2.1;Cre02.g116750.t1.1	>Cre02.g116750.t2.1 pacid=30784899 transcript=Cre02.g116750.t2.1 locus=Cre02.g116750 ID=Cre02.g116750.t2.1.v5.5 annot-version=v5.5;>Cre02.g116750.t1.1 pacid=30784898 transcript=Cre02.g116750.t1.1 locus=Cre02.g116750 ID=Cre02.g116750.t1.1.v5.5 annot-version	14
26.4569	25.5739	26.0962	28.6608	28.6836	29.1967	26.3485	27.4156	26.9834	27.9575	28.4235	28.6874		33.527	0	158.01	7	6	7	12	12	13	92111000	49948000	71737000	424400000	431160000	615289984	85446000	179030000	132680000	260650000	360030016	432270016	0.000830168	0.00360656	-2.80473	-3.46128	0.0186475	0.0253671	-1.44031	-1.64374	Cre09.g386650.t2.1;Cre09.g386650.t1.2	Cre09.g386650.t2.1;Cre09.g386650.t1.2	>Cre09.g386650.t2.1 pacid=30781166 transcript=Cre09.g386650.t2.1 locus=Cre09.g386650 ID=Cre09.g386650.t2.1.v5.5 annot-version=v5.5;>Cre09.g386650.t1.2 pacid=30781165 transcript=Cre09.g386650.t1.2 locus=Cre09.g386650 ID=Cre09.g386650.t1.2.v5.5 annot-version	14
																														Bait protein ZnJ6 (Cre06.g251716) is highlighted in red

## Sheet: Manual categorization
Protein IDs	Description	Student's T-test p-value MBP control_Zn CreO6-Intensity	Student's T-test q-value MBP control_Zn CreO6-Intensity	Student's T-test Difference MBP control_Zn CreO6-Intensity	Student's T-test Test statistic MBP control_Zn CreO6-Intensity	Student's T-test p-value LFQ MBP contro_LFQ Zn CreO6-LFQ	Student's T-test q-value LFQ MBP contro_LFQ Zn CreO6-LFQ	Student's T-test Difference LFQ MBP contro_LFQ Zn CreO6-LFQ	Student's T-test Test statistic LFQ MBP contro_LFQ Zn CreO6-LFQ	Intensity MBP control 1	Intensity MBP control 2	Intensity MBP control 3	Intensity Zn CreO6 1	Intensity Zn CreO6 2	Intensity Zn CreO6 3	LFQ intensity MBP control 1	LFQ intensity MBP control 2	LFQ intensity MBP control 3	LFQ intensity Zn CreO6 1	LFQ intensity Zn CreO6 2	LFQ intensity Zn CreO6 3	Only identified by site	Mol. weight [kDa]
Mitochondrial
Cre13.g581600.t1.2	Mitochondrial F1F0 ATP synthase associated 31.2 kDa protein	3.32858e-05	0	-9.07335	-9.63114	2.16743e-08	0	-8.71339	-15.3524	18	18	18	27.6893	26.216	27.3147	18	18	18	26.6649	26.6284	26.8469		34.017
Cre07.g338050.t1.2	Mitochondrial F1F0 ATP synthase associated 36.3 kDa protein	0.000391437	0	-6.83515	-6.08805	8.62241e-06	0	-6.54525	-9.0022	18	18	18	25.4811	23.59	25.4343	18	18	18	24.1418	24.5664	24.9276		39.728
Cre16.g680000.t1.2	Mitochondrial ATP synthase subunit 5, OSCP subunit	3.81052e-06	0	-8.74538	-11.7041	1.04756e-05	0	-8.42624	-10.4418	18	18	18	26.2512	27.0054	26.9796	18	18	18	25.8768	26.9382	26.4637		25.879
Cre03.g172300.t1.2	Mitochondrial phosphate carrier protein	7.75955e-05	0	-7.70511	-7.98578	2.48148e-05	0	-7.35661	-8.83269	18	18	18	25.734	24.8859	26.4954	18	18	18	24.763	25.3924	25.9145		37.439
Cre15.g635850.t2.1	Mitochondrial F1F0 ATP synthase, gamma subunit	0.0003646	0	-5.95489	-5.76624	0.000793146	0.00177143	-5.541	-5.01073	24.3883	24.1704	22.8071	29.7806	29.3845	30.0654	23.8566	24.8557	22.8367	29.1341	29.3384	29.6995		35.093
Cre12.g509750.t1.2	Mitochondrial processing peptidase alpha subunit	0.00279417	0.00319266	-5.79207	-4.18795	0.00329574	0.00390909	-5.09867	-3.88395	24.1979	23.0395	21.3695	28.3596	28.3124	29.311	23.7996	24.1284	21.7343	27.7476	28.3767	28.8339		49.589
Cre16.g672650.t1.2	Mitochondrial substrate carrier protein, possible 2-oxoglutarate/malate carrier	0.000437374	0	-5.10775	-5.21834	0.00451255	0.00638384	-3.88011	-3.30542	25.7358	25.1208	24.2296	30.0439	29.8544	30.5111	25.8894	26.8397	24.782	29.0949	30.1348	29.9217		29.207
Cre09.g416150.t1.2	Mitochondrial F1F0 ATP synthase associated 19.5 kDa protein	0.0111824	0.00357724	-7.72395	-3.45927	0.0421708	0.00669919	-6.69781	-2.41436	22.9547	18	18	27.8151	26.331	27.9804	24.7615	18	18	27.4795	26.4289	26.9466		22.203
Cre07.g337650.t1.2	Mitochondrial pyruvate dehydrogenase complex, E1 component	0.00321085	0.00334615	-6.98202	-4.34981	0.0252862	0.00716522	-5.86205	-2.68518	18	18	20.7428	26.8187	24.7152	26.1549	18	18	22.9762	25.1864	25.2874	26.0886		43.71
								-58.1211
Light related proteins
Cre09.g393173.t1.1	Early light-inducible protein	3.30529e-08	0	-8.73064	-15.1778	1.4334e-06	0	-8.35182	-12.1961	18	18	18	26.7474	26.5928	26.8517	18	18	18	26.0157	26.6529	26.3868		18.747
Cre16.g665250.t1.2	Thykaloid associated protein required for photosynthetic acclimation to variable light intensity	3.22619e-08	0	-7.9806	-14.0418	7.57984e-06	0	-7.61305	-10.074	18	18	18	25.8524	26.0858	26.0037	18	18	18	25.1787	26.064	25.5964		29.63
Cre13.g576760.t1.1	EARLY LIGHT-INDUCED PROTEIN 1, CHLOROPLASTIC-RELATED	2.64591e-08	0	-8.76573	-15.3397	9.75736e-06	0	-8.34674	-10.4504	18	18	18	26.889	26.7666	26.6415	18	18	18	26.0915	26.9421	26.0066		38.845
Cre01.g002500.t1.2	Chlamyopsin, light-gated proton channel rhodopsin	0.00577715	0.00305263	-6.84527	-3.86111	0.00378105	0.00293023	-6.01229	-4.02204	25.1007	22.8982	20.7544	30.1864	29.4926	29.6102	24.6404	23.3222	21.676	29.8704	29.574	28.2311		26.577
Cre01.g015350.t1.1	Light-dependent protochlorophyllide reductase	0.0196596	0.00451429	-7.08297	-2.97555	0.0415314	0.00664516	-6.22664	-2.39192	24.0363	18	23.12	28.8092	28.6378	28.9582	23.8767	18	24.5765	28.0478	28.9204	28.1649		41.871
								-36.5505
Transport
Cre06.g252200.t1.2	Translocon at the outer envelope membrane of chloroplasts	1.07248e-05	0	-6.47393	-8.78125	2.60707e-06	0	-6.10616	-9.29479	18	18	18	24.5174	24.043	24.8614	18	18	18	23.8052	24.1795	24.3338		44.541
Cre07.g318450.t1.2	SEC61-beta subunit of ER-translocon	5.01728e-07	0	-8.56263	-13.2614	2.02579e-05	0	-8.17572	-9.60114	18	18	18	26.2761	26.6602	26.7516	18	18	18	25.5117	26.7078	26.3077		9.4587
Cre10.g452450.t1.2	translocon of chloroplast envelope inner membrane	3.54494e-05	0	-8.38724	-9.16446	4.52013e-05	0	-8.00281	-8.68739	18	18	18	26.2117	25.7721	27.1779	18	18	18	25.1917	26.6053	26.2115		115.13
Cre08.g358526.t1.1	Plastidic ADP/ATP translocase	0.000235838	0	-6.87747	-6.54792	6.26115e-05	0	-6.49361	-7.45471	18	18	18	25.7979	23.8946	24.9399	18	18	18	24.4963	23.8496	25.135		62.309
								-28.7783
Oxidoreductases
Cre10.g434450.t1.2	NADH:ubiquinone oxidoreductase 39 kDa subunit	2.56663e-07	0	-6.56121	-11.0385	7.0344e-05	0	-6.1421	-7.12976	18	18	18	24.3981	24.5605	24.725	18	18	18	23.5135	24.7657	24.1471		43.654
Cre15.g638500.t1.2	Ubiquinol:cytochrome c oxidoreductase cytochrome c1	2.4801e-06	0	-6.40765	-9.66979	8.38746e-07	0	-6.02895	-9.77695	18	18	18	24.5879	24.083	24.552	18	18	18	23.7988	24.1111	24.177		33.834
Cre12.g523850.t1.2	Ubiquinol:cytochrome c oxidoreductase	0.0111891	0.0041875	-6.63969	-3.3368	0.0298207	0.00692437	-5.78714	-2.5703	18	22.4973	22.4153	27.7974	27.4109	27.6235	18	23.6189	22.7853	27.1702	27.2339	27.3615		55.054
Cre01.g051900.t1.2	Rieske iron-sulfur protein of mitochondrial ubiquinol-cytochrome c reductase	2.76526e-07	0	-9.86959	-15.3097	5.13478e-07	0	-9.53969	-14.3834	18	18	18	27.5969	27.9222	28.0897	18	18	18	27.2316	27.7873	27.6002		28.511
Cre11.g467689.t1.1	Rieske iron-sulfur subunit of the cytochrome b6f complex, chloroplast precursor	6.34074e-07	0	-8.97089	-13.5546	9.07193e-07	0	-8.58066	-12.8201	18	18	18	27.1549	26.6483	27.1095	18	18	18	26.3995	26.919	26.4234		21.525
Cre01.g050950.t1.2	Geranylgeranyl diphosphate reductase / Geranylgeranyl reductase	0.000439348	0	-5.18177	-5.2537	0.00514601	0.00589011	-4.88055	-3.53953	25.4325	25.6262	24.406	30.4157	29.773	30.8214	24.3981	26.4806	24.0636	29.4742	29.355	30.7547		55.608
Cre12.g514200.t1.2	GLUCOSE-METHANOL-CHOLINE GMC OXIDOREDUCTASE	0.000905916	0.00247191	-5.68684	-4.97249	0.00734132	0.00632	-4.74119	-3.28595	26.1566	27.0558	24.9743	31.7912	31.3385	32.1175	25.9249	28.4852	25.4798	31.159	31.4286	31.5258		64.459
								-45.7003
chloroplast Proeins
Cre12.g546050.t1.2	1-deoxy-D-xylulose 5-phosphate reductoisomerase, chloroplast precursor	0.00344437	0.00348	-8.07496	-4.47942	0.0179031	0.00686792	-7.04303	-3.03956	21.8541	18	18	27.6424	26.9362	27.5004	23.2122	18	18	25.8266	27.6669	26.8478		49.509
Cre02.g142146.t1.1	Divinyl chlorophyllide a 8-vinyl-reductase / [4-vinyl]chlorophyllide a reductase	0.000100296	0	-5.74828	-6.6066	0.0232528	0.0064375	-3.15473	-2.28236	21.8567	21.4352	22.537	27.7041	27.3659	28.0036	23.2169	23.7594	23.7956	25.5852	28.4301	26.2207		40.863
Cre10.g452800.t1.2	Low-CO2-inducible protein	2.88954e-07	0	-7.0591	-11.6754	2.81913e-08	0	-6.69102	-12.0471	18	18	18	25.2166	24.8611	25.0996	18	18	18	24.6827	24.7909	24.5995		48.005
Cre13.g581650.t1.2	Plastid ribosomal protein L7/L12	8.27778e-06	0	-7.90671	-10.2483	1.02306e-08	0	-7.62242	-13.8846	18	18	18	25.4688	25.8476	26.4037	18	18	18	25.6333	25.5327	25.7013		16.875
Cre02.g088900.t1.2	Plastid ribosomal protein L1	0.00107407	0.00241758	-5.8854	-4.91919	0.00155714	0.00315	-5.05603	-4.36011	23.9466	23.3355	21.7284	29.2062	28.472	28.9885	23.6247	24.2963	22.3188	28.7467	27.8443	28.8169		32.439	0
								-29.5672
Chlorophyll binding proteins
Cre01.g066917.t1.1	Chlorophyll a/b binding protein of LHCII	7.50293e-05	0	-5.92332	-6.93329	0.00191933	0.00303614	-4.84189	-4.14669	27.8903	28.2177	27.1237	33.8782	33.3945	33.7289	27.8662	29.7587	27.6859	33.1208	33.3691	33.3465		27.565
Cre03.g156900.t1.2	Chlorophyll a/b binding protein of LHCII	7.59551e-05	0	-5.11837	-6.34145	0.00241885	0.00494382	-3.92263	-3.6479	27.8105	27.8535	26.9913	32.6172	32.485	32.9083	27.9114	29.4757	27.6998	32.0227	32.4361	32.3961		28.687
Cre01.g043350.t1.2	Chlorophyllide a oxygenase	0.436338	0.654514	0.636375	0.514627	0.00413882	0.00570213	-4.32068	-3.50477	23.7806	22.7529	23.7469	22.19	22.0825	24.0988	18	18	18	21.4454	21.7403	23.7764		72.106
Cre04.g232104.t1.1	Light-harvesting complex II chlorophyll a/b binding protein M3	8.385e-05	0	-4.71928	-5.97106	0.00427791	0.00625743	-3.5866	-3.22006	28.833	29.0675	28.365	33.669	33.0663	33.688	28.8282	30.6933	28.8966	32.9343	33.1123	33.1313		27.38
Cre11.g467573.t1.1	Chlorophyll a/b binding protein of photosystem I, type III	0.000230248	0	-5.09734	-5.62996	0.00645359	0.00613592	-3.74436	-3.07387	26.8182	26.7304	25.7372	31.1059	31.7213	31.7506	27.2083	28.5275	26.405	30.4382	31.6806	31.2551		28.886
								-20.4162
Photosystem Proteins
Cre10.g425900.t1.2	Light-harvesting protein of photosystem I	4.97857e-05	0	-5.35454	-6.78845	0.00100668	0.00296471	-3.85996	-4.06707	27.81	27.4141	27.37	32.8011	32.497	33.3597	28.2633	29.3369	28.2069	32.0252	32.4435	32.9182		28.228
Cre12.g560950.t1.2	Photosystem I reaction center subunit V	1.42999e-05	0	-4.99276	-7.16653	0.00240571	0.00546939	-3.36403	-3.38888	27.4904	27.2496	27.1737	32.4854	32.4527	31.954	28.0369	29.3048	28.1914	31.7265	32.4321	31.4665		13.223
Cre10.g452050.t1.2	Light-harvesting protein of photosystem I	4.97996e-05	0	-5.46082	-6.87307	0.00275839	0.00488889	-4.06416	-3.63697	26.4771	26.5911	25.7512	31.724	31.5096	31.9684	26.811	28.3493	26.4771	30.8355	31.4706	31.5238		28.702
Cre06.g278213.t1.1	Light-harvesting protein of photosystem I	0.000194866	0	-4.67226	-5.45756	0.00341652	0.00619608	-3.11249	-3.10934	28.5042	28.3605	27.5152	32.656	32.5882	33.1524	28.984	30.1634	28.6668	31.9715	32.5301	32.65		27.781
Cre16.g673650.t1.1	Minor chlorophyll a/b binding protein of photosystem II	0.00221357	0.00341176	-6.05244	-4.42791	0.00450117	0.00582609	-4.57178	-3.53459	28.1434	27.7904	25.3918	33.2391	33.0308	33.213	27.9462	29.5758	26.8465	32.6367	32.7443	32.7028		30.714
Cre16.g687900.t1.2	Light-harvesting protein of photosystem I	1.01253e-05	0	-5.38629	-7.75501	0.0080206	0.00749091	-3.41282	-2.85372	27.8318	28.2385	27.7349	33.5099	33.1027	33.3514	29.1959	30.6944	28.3504	32.6082	33.0249	32.8461		26.222
Cre06.g272650.t1.2	Light-harvesting protein of photosystem I	0.000920146	0.0025	-5.77167	-4.99313	0.00990025	0.00762963	-4.19805	-2.97908	26.998	27.1246	25.3073	32.3954	31.6797	32.6698	27.1918	29.2301	26.2195	31.3928	31.7597	32.083		25.921
Cre07.g344950.t1.2	Light-harvesting protein of photosystem I	0.000634138	0.00234043	-4.6713	-4.75719	0.0214976	0.00648819	-3.16939	-2.32203	26.4833	27.3245	25.6991	31.1564	30.9928	31.3717	27.0212	29.2464	26.4498	30.48	30.9707	30.7749		22.844
								-29.7527
Metabolic Proteins
Cre09.g410700.t1.2	NADP-dependent malate dehydrogenase, chloroplastic	8.95982e-07	0	-8.99431	-13.287	6.13956e-09	0	-8.63099	-15.7265	18	18	18	27.3482	26.8165	26.8182	18	18	18	26.5364	26.6994	26.6572		44.852
Cre07.g338451.t1.1	Fructose-bisphosphatase / Hexose diphosphatase	1.70848e-06	0	-8.20201	-11.8932	8.75144e-08	0	-7.78647	-13.2969	18	18	18	26.5609	25.9163	26.1289	18	18	18	25.6154	25.8765	25.8675		42.32
Cre12.g518900.t1.2	Pyridoxine 4-dehydrogenase / Pyridoxine dehydrogenase	1.68323e-05	0	-7.28684	-9.11931	2.50014e-07	0	-6.91379	-11.5458	18	18	18	25.7103	24.7093	25.4409	18	18	18	24.8107	24.8193	25.1114		40.832
Cre12.g560800.t1.2	IAA-amino acid hydrolase [EC:3.5.1.-] (ILR1)	0.0427025	0.0104304	-4.38417	-2.19761	3.78017e-07	0	-6.88602	-11.3045	18	21.9644	22.5637	26.0045	24.5206	25.1555	18	18	18	24.941	25.0414	24.6756		49.196
Cre17.g701700.t2.1	Plastid acyl-ACP desaturase	0.000191052	0	-7.67289	-7.09224	1.49812e-06	0	-7.37356	-11.0887	18	18	18	26.4156	24.5256	26.0774	18	18	18	25.6628	25.0915	25.3663		44.71
Cre11.g467723.t2.1	3-ketoacyl-CoA-synthase	0.000651639	0	-6.29875	-5.45607	1.71819e-06	0	-6.22428	-9.66332	18	18	18	23.5647	23.7273	25.6043	18	18	18	24.0825	24.5125	24.0778		48.543
Cre01.g004500.t1.2	Isopropylmalate dehydratase, large subunit	5.2398e-06	0	-9.17813	-11.7516	3.08421e-06	0	-8.74323	-11.9054	18	18	18	27.3897	26.6214	27.5233	18	18	18	26.2745	26.9851	26.97		52.803
Cre06.g261800.t1.2	Prephenate dehydratase	1.72894e-07	0	-9.28071	-14.9459	3.25849e-06	0	-8.94094	-12.0333	18	18	18	27.1581	27.5226	27.1614	18	18	18	26.5198	27.3616	26.9415		40.5
Cre03.g158000.t1.2	Glutamate-1-semialdehyde aminotransferase	0.000161824	0	-7.12087	-6.99731	5.58414e-06	0	-6.78972	-9.54647	18	18	18	25.6284	24.0856	25.6486	18	18	18	24.6654	24.5022	25.2015		49.227
Cre07.g325400.t1.2	2 - 3-Isopropylmalate dehydrogenase, splicing variant a; 3-Isopropylmalate dehydrogenase, splicing variant b	9.00489e-07	0	-6.61219	-10.4917	1.8946e-05	0	-6.25436	-8.18171	18	18	18	24.6209	24.8333	24.3824	18	18	18	23.9807	24.7831	23.9993		42.811
Cre10.g461050.t1.2	Vacuolar ATP synthase subunit A	0.000429318	0	-5.7698	-5.55703	3.29531e-05	0	-5.507	-7.17393	18	18	18	23.6607	22.8968	24.7519	18	18	18	23.0145	23.9348	23.5717		68.394
Cre03.g185550.t1.2	Sedoheptulose-1,7-bisphosphatase	5.30491e-05	0	-6.03621	-7.26559	0.000125381	0.00213793	-5.66343	-6.39315	18	18	18	24.4561	24.269	23.3835	18	18	18	23.765	24.2752	22.9501		41.446
Cre12.g485150.t1.2	Glyceraldehyde 3-phosphate dehydrogenase	0.000125445	0	-7.19147	-7.26387	0.000296455	0.00217544	-7.20214	-6.48248	22.181	22.6962	21.0649	29.1179	29.0482	29.3503	21.2832	22.7996	20.804	28.6308	29.0003	28.8621		39.759
Cre16.g666050.t1.2	Saccharopine dehydrogenase	0.000864707	0.00355102	-4.54128	-4.5061	0.00057599	0.00163158	-4.28148	-4.59941	18	18	18	21.5448	22.8698	23.2093	18	18	18	22.0928	23.104	21.6476		48.623
Cre08.g359350.t1.2	acetyl-CoA carboxylase, biotin carboxylase subunit (accC)	0.00413631	0.00331429	-8.19962	-4.33739	0.00158398	0.00185075	-8.69372	-5.30325	23.1949	23.8609	19.448	30.1616	30.1407	30.8004	21.2192	23.1762	19.4228	29.2694	30.2407	30.3894		56.195
Cre04.g214150.t1.1	Thiazole biosynthetic enzyme; THI4 regulatory protein	0.00139594	0	-10.9049	-5.79355	0.00188164	0.00190769	-10.336	-5.38965	22.0988	18	18	30.5042	29.853	30.4563	22.2437	18	18	29.6145	29.9335	29.7035		36.892
Cre09.g416050.t1.2	Argininosuccinate synthase	0.00144666	0.00344554	-5.21707	-4.46845	0.00271357	0.00552577	-3.62053	-3.4559	24.6823	23.2415	22.5807	29.1851	28.6223	28.3484	24.5534	25.5911	23.8793	28.3834	28.6388	27.8633		49.021
Cre01.g010900.t1.2	Glyceraldehyde-3-Phosphate Dehydrogenase	7.56863e-06	0	-4.26443	-6.6302	0.00292702	0.00576344	-3.85289	-3.5193	28.6545	28.8382	28.9648	33.0068	32.9411	33.3029	28.0466	29.8897	28.6235	32.2303	32.995	32.8931		40.304
Cre02.g099850.t1.1	Pyruvate dehydrogenase, E1 component, alpha subunit	0.00354961	0.00351515	-8.43208	-4.50563	0.0180831	0.00607692	-7.50524	-3.07306	18	22.063	18	28.1385	27.8272	27.3936	18	23.8209	18	27.2932	27.5951	27.4483		51.705
Cre16.g656400.t1.2	UDP-sulfoquinovose synthase	0.0005927	0	-6.98017	-5.77984	0.0212031	0.00722807	-4.98005	-2.68719	18	18.9063	19.6441	25.406	25.2123	26.8727	18	21.5153	21.2966	24.0632	25.0978	26.5911		52.873
Cre02.g141400.t1.2	Phosphoenolpyruvate carboxykinase	0.00298073	0.003625	-8.4619	-4.66805	0.0255965	0.00735714	-7.15032	-2.79207	18	18	21.7195	27.9125	26.872	28.3208	18	18	23.9546	26.3705	26.8214	28.2137		67.536
Cre12.g498550.t1.1	Magnesium protoporphyrin O-methyltransferase	0.0148802	0.00478788	-6.66667	-3.13445	0.0372215	0.0067541	-5.79008	-2.4279	22.6972	22.9664	18	27.7843	27.5761	28.3032	22.8299	24.1826	18	27.1149	27.5709	27.697		34.993
								-149.126
Hypothetical
Cre10.g434200.t1.1	hypothetical	2.99906e-06	0	-8.18285	-11.3994	1.28509e-08	0	-7.81407	-14.1262	18	18	18	26.3774	25.748	26.4232	18	18	18	25.7141	25.8326	25.8955		18.84
Cre05.g240300.t1.1	hypothetical	4.43047e-08	0	-7.27042	-12.8134	1.93072e-06	0	-6.90383	-10.3882	18	18	18	25.2303	25.179	25.4019	18	18	18	24.5799	25.1166	25.015		13.502
Cre16.g676550.t1.2	hypothetical	0.000320781	0	-6.20668	-5.98346	1.44813e-05	0	-6.05724	-8.19246	18	18	18	23.1608	24.5161	24.9432	18	18	18	23.6168	24.1149	24.44		35.247
Cre17.g722750.t1.2	hypothetical	0.00111302	0.00111628	-6.61429	-5.12738	2.22561e-05	0	-6.40478	-8.19041	18	18	18	25.3445	23.0358	25.4626	18	18	18	24.3365	23.9541	24.9237		38.977
Cre02.g142246.t1.1	hypothetical	4.88316e-06	0	-6.97752	-9.82901	3.56236e-05	0	-6.64542	-8.01258	18	18	18	24.7923	25.3964	24.7439	18	18	18	24.217	25.293	24.4263		10.553
Cre06.g278255.t1.1	hypothetical	6.03809e-05	0	-4.73423	-6.16383	6.0247e-05	0.00203279	-4.35266	-5.83214	18	18	18	22.7069	22.2842	23.2116	18	18	18	22.0409	22.1782	22.8389		106.99
Cre12.g499800.t1.2	hypothetical	1.14723e-05	0	-6.48957	-8.74751	0.000104342	0	-6.10515	-6.80605	18	18	18	24.5896	24.8495	24.0297	18	18	18	23.7856	24.8944	23.6354		10.479
Cre09.g400050.t1.1	hypothetical	0.00421573	0.004288	-4.15147	-3.43761	0.000149698	0.0017971	-3.91666	-5.02689	18	18	18	22.5851	20.7679	23.1014	18	18	18	21.6487	21.6264	22.4748		60.072
Cre03.g164000.t1.2	hypothetical	0.000328825	0	-4.85901	-5.26255	0.000395482	0.00172222	-4.49778	-4.93798	25.6244	24.2897	24.6671	29.6174	30.008	29.5329	24.9398	25.0799	24.5626	28.9927	30.1198	28.9632		24.228
Cre09.g416800.t1.2	hypothetical	0.0108276	0.00363636	-7.5744	-3.46904	0.0270741	0.00729204	-6.82927	-2.72754	22.9965	18	18	27.6269	26.7859	27.3069	24.0092	18	18	26.9432	26.7828	26.7709		22.779
								-59.5268
Chaperones
Cre06.g250100.t1.2	Heat shock protein 70B	0.000694114	0	-6.49832	-5.47771	3.60533e-08	0	-6.2717	-11.2958	18	18	18	25.257	23.1283	25.1096	18	18	18	24.1809	24.3716	24.2626		71.954
Cre04.g229300.t1.1	Rubisco activase	0.000193887	0	-6.25283	-6.40683	0.00235019	0.00307317	-5.33784	-4.18043	24.7816	24.6769	23.4197	30.653	30.181	30.8026	24.3832	26.3286	23.7801	30.0407	30.076	30.3886		45.029
								-11.6095
General
Cre12.g517400.t1.2	Small Rab-related GTPase	0.000442699	0.00252874	-4.76676	-5.02698	0.000165389	0.00196825	-4.62711	-5.52002	18	18	18	22.1712	23.6448	22.4842	18	18	18	23.0572	22.8643	21.9599		22.121
Cre02.g120250.t2.1	Calcium/calmodulin-dependent protein kinase	0.00928283	0.00415504	-5.57481	-3.30811	0.006936	0.00558333	-5.4495	-3.47873	18	18	18	21.9326	22.9156	25.8763	18	18	18	21.6144	23.4255	25.3087		79.655
Cre12.g549550.t1.2	Beta tubulin 2	5.45011e-05	0	-7.09558	-7.95906	1.77116e-08	0	-6.6831	-12.1673	18	18	18	25.1813	24.3787	25.7268	18	18	18	24.5851	24.7229	24.7413		49.618
Cre07.g321300.t1.2	Bacterial PH domain (bPH_2)	0.000614318	0.00244444	-5.02871	-4.95647	8.68268e-07	0	-4.74062	-8.00077	18	18	18	24.0444	22.3773	22.6644	18	18	18	22.8806	22.7755	22.5658		21.705
Cre48.g761197.t1.1	large subunit ribosomal protein L3 (RP-L3, MRPL3, rplC)	3.04256e-05	0	-5.48584	-7.20582	2.85392e-05	0	-5.11304	-6.91274	18	18	18	23.403	23.0804	23.9741	18	18	18	22.7118	23.0866	23.5407		27.831
Cre08.g358540.t1.1	PF03703 - Bacterial PH domain (bPH_2)	1.37792e-05	0	-5.84047	-8.02331	0.00022211	0.00206667	-5.44844	-5.86259	18	18	18	23.3988	23.9633	24.1592	18	18	18	22.5925	23.9363	23.8165		27.168
Cre12.g510050.t1.2	Copper target 1 protein	0.000691561	0	-6.2883	-5.40462	0.00260697	0.00311111	-5.72137	-4.21885	22.7734	23.1945	21.6096	28.5297	28.1908	29.722	21.8746	23.9027	22.11	28.0315	27.5654	29.4545		47.178
Cre06.g269050.t1.2	PRESTALK A DIFFERENTIATION PROTEIN A	0.000323298	0	-6.13089	-5.94188	2.43107e-06	0	-5.93399	-9.13102	18	18	18	23.7249	23.4825	25.1853	18	18	18	23.7001	23.8886	24.2133		91.204
								-43.7172
Proteases
Cre12.g485800.t1.2	FtsH-like membrane ATPase/metalloprotease	0.00020327	0	-5.04803	-5.67889	0.00191834	0.003	-4.71358	-4.09923	23.4472	24.0863	22.8601	28.6013	28.2003	28.7361	22.6059	24.6502	23.0242	28.012	27.9074	28.5016		77.546
Cre03.g204350.t1.2	Inactive subunit of chloroplast ClpP complex	9.97321e-06	0	-6.36414	-8.7299	4.57929e-07	0	-5.98642	-9.98491	18	18	18	24.6501	23.9113	24.531	18	18	18	23.8683	24.1843	23.9067		30.966
Cre12.g500950.t1.2	Active subunit of chloroplast ClpP peptidase	6.67046e-06	0	-7.29089	-9.89048	1.97993e-05	0	-6.86427	-8.65115	18	18	18	25.4747	24.8203	25.5777	18	18	18	24.5568	24.585	25.451		38.407
Cre07.g331500.t1.1	Inactive subunit of chloroplast ClpP complex	0.000374955	0	-7.39561	-6.34068	0.0451248	0.00629008	-5.34448	-2.26719	18	18	19.9065	26.026	25.6863	26.3809	18	18	23.4399	24.3578	25.6272	25.4883		46.857
Cre14.g619100.t1.2	Inactive subunit of chloroplast ClpP complex	0.00862898	0.00354839	-6.15009	-3.45422	0.0483364	0.00624242	-4.79068	-2.17254	22.2316	21.0929	18	26.5254	26.2774	26.9719	22.7248	23.1382	18	25.4855	25.8187	26.9309		46.219
								-27.6994
								Column I	log 2 fold change of individual protein ≤ -3
								Column I	Sum of intensities of proteins in the category

## Sheet: GO, Biological process
Protein IDs	Description	Student's T-test p-value MBP control_Zn CreO6-Intensity	Student's T-test q-value MBP control_Zn CreO6-Intensity	Student's T-test Difference MBP control_Zn CreO6-Intensity	Student's T-test Test statistic MBP control_Zn CreO6-Intensity	Student's T-test p-value LFQ MBP contro_LFQ Zn CreO6-LFQ	Student's T-test q-value LFQ MBP contro_LFQ Zn CreO6-LFQ	Student's T-test Difference LFQ MBP contro_LFQ Zn CreO6-LFQ	Student's T-test Test statistic LFQ MBP contro_LFQ Zn CreO6-LFQ	Intensity MBP control 1	Intensity MBP control 2	Intensity MBP control 3	Intensity Zn CreO6 1	Intensity Zn CreO6 2	Intensity Zn CreO6 3	LFQ intensity MBP control 1	LFQ intensity MBP control 2	LFQ intensity MBP control 3	LFQ intensity Zn CreO6 1	LFQ intensity Zn CreO6 2	LFQ intensity Zn CreO6 3	Only identified by site	Mol. weight [kDa]	Go ontology	Biological process	Enrichment in test compaired to refrence
Cre09.g410700.t1.2	NADP-dependent malate dehydrogenase, chloroplastic	8.95982e-07	0	-8.99431	-13.287	6.13956e-09	0	-8.63099	-15.7265	18	18	18	27.3482	26.8165	26.8182	18	18	18	26.5364	26.6994	26.6572		44.852	GO:0055114,GO:0016616,GO:0016491,GO:0016615,GO:0006108	oxido-reductase	4.63
Cre13.g581650.t1.2	Plastid ribosomal protein L7/L12	8.27778e-06	0	-7.90671	-10.2483	1.02306e-08	0	-7.62242	-13.8846	18	18	18	25.4688	25.8476	26.4037	18	18	18	25.6333	25.5327	25.7013		16.875	GO:0006412,GO:0003735
Cre10.g434200.t1.1	Miscellaneous	2.99906e-06	0	-8.18285	-11.3994	1.28509e-08	0	-7.81407	-14.1262	18	18	18	26.3774	25.748	26.4232	18	18	18	25.7141	25.8326	25.8955		18.84	0
Cre12.g549550.t1.2	Beta tubulin 2	5.45011e-05	0	-7.09558	-7.95906	1.77116e-08	0	-6.6831	-12.1673	18	18	18	25.1813	24.3787	25.7268	18	18	18	24.5851	24.7229	24.7413		49.618	GO:0003924,GO:0007017,GO:0005874
Cre13.g581600.t1.2	Mitochondrial F1F0 ATP synthase associated 31.2 kDa protein	3.32858e-05	0	-9.07335	-9.63114	2.16743e-08	0	-8.71339	-15.3524	18	18	18	27.6893	26.216	27.3147	18	18	18	26.6649	26.6284	26.8469		34.017	0
Cre10.g452800.t1.2	Low-CO2-inducible protein	2.88954e-07	0	-7.0591	-11.6754	2.81913e-08	0	-6.69102	-12.0471	18	18	18	25.2166	24.8611	25.0996	18	18	18	24.6827	24.7909	24.5995		48.005	0
Cre06.g250100.t1.2	Heat shock protein 70B	0.000694114	0	-6.49832	-5.47771	3.60533e-08	0	-6.2717	-11.2958	18	18	18	25.257	23.1283	25.1096	18	18	18	24.1809	24.3716	24.2626		71.954	0
Cre07.g338451.t1.1	Fructose-bisphosphatase / Hexose diphosphatase	1.70848e-06	0	-8.20201	-11.8932	8.75144e-08	0	-7.78647	-13.2969	18	18	18	26.5609	25.9163	26.1289	18	18	18	25.6154	25.8765	25.8675		42.32	GO:0042132,GO:0006094,GO:0006071
Cre12.g518900.t1.2	Pyridoxine 4-dehydrogenase / Pyridoxine dehydrogenase	1.68323e-05	0	-7.28684	-9.11931	2.50014e-07	0	-6.91379	-11.5458	18	18	18	25.7103	24.7093	25.4409	18	18	18	24.8107	24.8193	25.1114		40.832	0
Cre12.g560800.t1.2	IAA-amino acid hydrolase [EC:3.5.1.-] (ILR1)	0.0427025	0.0104304	-4.38417	-2.19761	3.78017e-07	0	-6.88602	-11.3045	18	21.9644	22.5637	26.0045	24.5206	25.1555	18	18	18	24.941	25.0414	24.6756		49.196	GO:0016787,GO:0008152	Metabolic process	2.8
Cre03.g204350.t1.2	Inactive subunit of chloroplast ClpP complex	9.97321e-06	0	-6.36414	-8.7299	4.57929e-07	0	-5.98642	-9.98491	18	18	18	24.6501	23.9113	24.531	18	18	18	23.8683	24.1843	23.9067		30.966	0
Cre01.g051900.t1.2	Rieske iron-sulfur protein of mitochondrial ubiquinol-cytochrome c reductase	2.76526e-07	0	-9.86959	-15.3097	5.13478e-07	0	-9.53969	-14.3834	18	18	18	27.5969	27.9222	28.0897	18	18	18	27.2316	27.7873	27.6002		28.511	GO:0055114,GO:0008121,GO:0051537,GO:0016491,GO:0016679	oxidoreductase	4.63
Cre15.g638500.t1.2	Ubiquinol:cytochrome c oxidoreductase cytochrome c1	2.4801e-06	0	-6.40765	-9.66979	8.38746e-07	0	-6.02895	-9.77695	18	18	18	24.5879	24.083	24.552	18	18	18	23.7988	24.1111	24.177		33.834	GO:0020037,GO:0009055	oxidoreductase	4.63
Cre07.g321300.t1.2	Bacterial PH domain (bPH_2)	0.000614318	0.00244444	-5.02871	-4.95647	8.68268e-07	0	-4.74062	-8.00077	18	18	18	24.0444	22.3773	22.6644	18	18	18	22.8806	22.7755	22.5658		21.705	0
Cre11.g467689.t1.1	Rieske iron-sulfur subunit of the cytochrome b6f complex, chloroplast precursor	6.34074e-07	0	-8.97089	-13.5546	9.07193e-07	0	-8.58066	-12.8201	18	18	18	27.1549	26.6483	27.1095	18	18	18	26.3995	26.919	26.4234		21.525	GO:0055114,GO:0051537,GO:0016491,GO:0042651,GO:0009496,GO:0016679	oxidoreductase	4.63
Cre09.g393173.t1.1	Early light-inducible protein	3.30529e-08	0	-8.73064	-15.1778	1.4334e-06	0	-8.35182	-12.1961	18	18	18	26.7474	26.5928	26.8517	18	18	18	26.0157	26.6529	26.3868		18.747	0
Cre17.g701700.t2.1	Plastid acyl-ACP desaturase	0.000191052	0	-7.67289	-7.09224	1.49812e-06	0	-7.37356	-11.0887	18	18	18	26.4156	24.5256	26.0774	18	18	18	25.6628	25.0915	25.3663		44.71	GO:0055114,GO:0045300,GO:0006631	oxido-reductase	4.63
Cre11.g467723.t2.1	3-ketoacyl-CoA-synthase	0.000651639	0	-6.29875	-5.45607	1.71819e-06	0	-6.22428	-9.66332	18	18	18	23.5647	23.7273	25.6043	18	18	18	24.0825	24.5125	24.0778		48.543	0
Cre05.g240300.t1.1	Miscellaneous	4.43047e-08	0	-7.27042	-12.8134	1.93072e-06	0	-6.90383	-10.3882	18	18	18	25.2303	25.179	25.4019	18	18	18	24.5799	25.1166	25.015		13.502	0
Cre06.g269050.t1.2	PRESTALK A DIFFERENTIATION PROTEIN A	0.000323298	0	-6.13089	-5.94188	2.43107e-06	0	-5.93399	-9.13102	18	18	18	23.7249	23.4825	25.1853	18	18	18	23.7001	23.8886	24.2133		91.204	0
Cre06.g252200.t1.2	Translocon at the outer envelope membrane of chloroplasts	1.07248e-05	0	-6.47393	-8.78125	2.60707e-06	0	-6.10616	-9.29479	18	18	18	24.5174	24.043	24.8614	18	18	18	23.8052	24.1795	24.3338		44.541	GO:0005525
Cre01.g004500.t1.2	Isopropylmalate dehydratase, large subunit	5.2398e-06	0	-9.17813	-11.7516	3.08421e-06	0	-8.74323	-11.9054	18	18	18	27.3897	26.6214	27.5233	18	18	18	26.2745	26.9851	26.97		52.803	GO:0008152	Metabolic process	2.8
Cre06.g261800.t1.2	Prephenate dehydratase	1.72894e-07	0	-9.28071	-14.9459	3.25849e-06	0	-8.94094	-12.0333	18	18	18	27.1581	27.5226	27.1614	18	18	18	26.5198	27.3616	26.9415		40.5	GO:0009094,GO:0004664
Cre03.g158000.t1.2	Glutamate-1-semialdehyde aminotransferase	0.000161824	0	-7.12087	-6.99731	5.58414e-06	0	-6.78972	-9.54647	18	18	18	25.6284	24.0856	25.6486	18	18	18	24.6654	24.5022	25.2015		49.227	GO:0030170,GO:0008483
Cre16.g665250.t1.2	Thykaloid associated protein required for photosynthetic acclimation to variable light intensity	3.22619e-08	0	-7.9806	-14.0418	7.57984e-06	0	-7.61305	-10.074	18	18	18	25.8524	26.0858	26.0037	18	18	18	25.1787	26.064	25.5964		29.63	0
Cre07.g338050.t1.2	Mitochondrial F1F0 ATP synthase associated 36.3 kDa protein	0.000391437	0	-6.83515	-6.08805	8.62241e-06	0	-6.54525	-9.0022	18	18	18	25.4811	23.59	25.4343	18	18	18	24.1418	24.5664	24.9276		39.728	0
Cre13.g576760.t1.1	EARLY LIGHT-INDUCED PROTEIN 1, CHLOROPLASTIC-RELATED	2.64591e-08	0	-8.76573	-15.3397	9.75736e-06	0	-8.34674	-10.4504	18	18	18	26.889	26.7666	26.6415	18	18	18	26.0915	26.9421	26.0066		38.845	0
Cre16.g680000.t1.2	Mitochondrial ATP synthase subunit 5, OSCP subunit	3.81052e-06	0	-8.74538	-11.7041	1.04756e-05	0	-8.42624	-10.4418	18	18	18	26.2512	27.0054	26.9796	18	18	18	25.8768	26.9382	26.4637		25.879	GO:0046933,GO:0015986	transporter	138.7
Cre16.g676550.t1.2	Miscellaneous	0.000320781	0	-6.20668	-5.98346	1.44813e-05	0	-6.05724	-8.19246	18	18	18	23.1608	24.5161	24.9432	18	18	18	23.6168	24.1149	24.44		35.247	0
Cre07.g325400.t1.2	2 - 3-Isopropylmalate dehydrogenase, splicing variant a; 3-Isopropylmalate dehydrogenase, splicing variant b	9.00489e-07	0	-6.61219	-10.4917	1.8946e-05	0	-6.25436	-8.18171	18	18	18	24.6209	24.8333	24.3824	18	18	18	23.9807	24.7831	23.9993		42.811	GO:0055114,GO:0016616,GO:0051287,GO:0000287	oxido-reductase	4.63
Cre12.g500950.t1.2	Active subunit of chloroplast ClpP peptidase	6.67046e-06	0	-7.29089	-9.89048	1.97993e-05	0	-6.86427	-8.65115	18	18	18	25.4747	24.8203	25.5777	18	18	18	24.5568	24.585	25.451		38.407	0
Cre07.g318450.t1.2	SEC61-beta subunit of ER-translocon	5.01728e-07	0	-8.56263	-13.2614	2.02579e-05	0	-8.17572	-9.60114	18	18	18	26.2761	26.6602	26.7516	18	18	18	25.5117	26.7078	26.3077		9.4587	GO:0006886,GO:0005784
Cre17.g722750.t1.2	Miscellaneous	0.00111302	0.00111628	-6.61429	-5.12738	2.22561e-05	0	-6.40478	-8.19041	18	18	18	25.3445	23.0358	25.4626	18	18	18	24.3365	23.9541	24.9237		38.977	0
Cre03.g172300.t1.2	Mitochondrial phosphate carrier protein	7.75955e-05	0	-7.70511	-7.98578	2.48148e-05	0	-7.35661	-8.83269	18	18	18	25.734	24.8859	26.4954	18	18	18	24.763	25.3924	25.9145		37.439	0
Cre48.g761197.t1.1	large subunit ribosomal protein L3 (RP-L3, MRPL3, rplC)	3.04256e-05	0	-5.48584	-7.20582	2.85392e-05	0	-5.11304	-6.91274	18	18	18	23.403	23.0804	23.9741	18	18	18	22.7118	23.0866	23.5407		27.831	GO:0006412,GO:0005840,GO:0005622,GO:0003735
Cre10.g461050.t1.2	Vacuolar ATP synthase subunit A	0.000429318	0	-5.7698	-5.55703	3.29531e-05	0	-5.507	-7.17393	18	18	18	23.6607	22.8968	24.7519	18	18	18	23.0145	23.9348	23.5717		68.394	GO:0046034,GO:0015992,GO:0033178,GO:0016820,GO:0015991,GO:0005524
Cre02.g142246.t1.1	Miscellaneous	4.88316e-06	0	-6.97752	-9.82901	3.56236e-05	0	-6.64542	-8.01258	18	18	18	24.7923	25.3964	24.7439	18	18	18	24.217	25.293	24.4263		10.553	0
Cre10.g452450.t1.2	translocon of chloroplast envelope inner membrane	3.54494e-05	0	-8.38724	-9.16446	4.52013e-05	0	-8.00281	-8.68739	18	18	18	26.2117	25.7721	27.1779	18	18	18	25.1917	26.6053	26.2115		115.13	0
Cre06.g278255.t1.1	Miscellaneous	6.03809e-05	0	-4.73423	-6.16383	6.0247e-05	0.00203279	-4.35266	-5.83214	18	18	18	22.7069	22.2842	23.2116	18	18	18	22.0409	22.1782	22.8389		106.99	0
Cre08.g358526.t1.1	Plastidic ADP/ATP translocase	0.000235838	0	-6.87747	-6.54792	6.26115e-05	0	-6.49361	-7.45471	18	18	18	25.7979	23.8946	24.9399	18	18	18	24.4963	23.8496	25.135		62.309	GO:0016021,GO:0006810,GO:0005524,GO:0005471	transporter	138.7
Cre10.g434450.t1.2	NADH:ubiquinone oxidoreductase 39 kDa subunit	2.56663e-07	0	-6.56121	-11.0385	7.0344e-05	0	-6.1421	-7.12976	18	18	18	24.3981	24.5605	24.725	18	18	18	23.5135	24.7657	24.1471		43.654	0
Cre12.g499800.t1.2	Miscellaneous	1.14723e-05	0	-6.48957	-8.74751	0.000104342	0	-6.10515	-6.80605	18	18	18	24.5896	24.8495	24.0297	18	18	18	23.7856	24.8944	23.6354		10.479	0
Cre03.g185550.t1.2	Sedoheptulose-1,7-bisphosphatase	5.30491e-05	0	-6.03621	-7.26559	0.000125381	0.00213793	-5.66343	-6.39315	18	18	18	24.4561	24.269	23.3835	18	18	18	23.765	24.2752	22.9501		41.446	GO:0042578,GO:0042132,GO:0005975	Metabolic process	2.8
Cre09.g400050.t1.1	Miscellaneous	0.00421573	0.004288	-4.15147	-3.43761	0.000149698	0.0017971	-3.91666	-5.02689	18	18	18	22.5851	20.7679	23.1014	18	18	18	21.6487	21.6264	22.4748		60.072	0
Cre12.g517400.t1.2	Small Rab-related GTPase	0.000442699	0.00252874	-4.76676	-5.02698	0.000165389	0.00196825	-4.62711	-5.52002	18	18	18	22.1712	23.6448	22.4842	18	18	18	23.0572	22.8643	21.9599		22.121	GO:0005525
Cre08.g358540.t1.1	PF03703 - Bacterial PH domain (bPH_2)	1.37792e-05	0	-5.84047	-8.02331	0.00022211	0.00206667	-5.44844	-5.86259	18	18	18	23.3988	23.9633	24.1592	18	18	18	22.5925	23.9363	23.8165		27.168	0
Cre12.g485150.t1.2	Glyceraldehyde 3-phosphate dehydrogenase	0.000125445	0	-7.19147	-7.26387	0.000296455	0.00217544	-7.20214	-6.48248	22.181	22.6962	21.0649	29.1179	29.0482	29.3503	21.2832	22.7996	20.804	28.6308	29.0003	28.8621		39.759	GO:0055114,GO:0016620	oxidoreductase	4.63
Cre03.g164000.t1.2	Miscellaneous	0.000328825	0	-4.85901	-5.26255	0.000395482	0.00172222	-4.49778	-4.93798	25.6244	24.2897	24.6671	29.6174	30.008	29.5329	24.9398	25.0799	24.5626	28.9927	30.1198	28.9632		24.228	0
Cre16.g666050.t1.2	Saccharopine dehydrogenase	0.000864707	0.00355102	-4.54128	-4.5061	0.00057599	0.00163158	-4.28148	-4.59941	18	18	18	21.5448	22.8698	23.2093	18	18	18	22.0928	23.104	21.6476		48.623	GO:0055114,GO:0016491	oxidoreductase	4.63
Cre06.g251716.t1.1	BAIT	9.33276e-09	0	-5.71273	-10.6605	0.000785369	0.00165333	-4.98315	-4.77569	32.1153	32.0916	32.0725	37.8202	37.7416	37.8556	31.7838	33.3715	31.9405	36.9771	37.6645	37.4037		26.906	0
Cre15.g635850.t2.1	Mitochondrial F1F0 ATP synthase, gamma subunit	0.0003646	0	-5.95489	-5.76624	0.000793146	0.00177143	-5.541	-5.01073	24.3883	24.1704	22.8071	29.7806	29.3845	30.0654	23.8566	24.8557	22.8367	29.1341	29.3384	29.6995		35.093	GO:0046961,GO:0046933,GO:0045261,GO:0015986	transporter	138.7
Cre10.g425900.t1.2	Light-harvesting protein of photosystem I	4.97857e-05	0	-5.35454	-6.78845	0.00100668	0.00296471	-3.85996	-4.06707	27.81	27.4141	27.37	32.8011	32.497	33.3597	28.2633	29.3369	28.2069	32.0252	32.4435	32.9182		28.228	GO:0016020,GO:0009765	Photosynthesis	369.9
Cre02.g088900.t1.2	Plastid ribosomal protein L1	0.00107407	0.00241758	-5.8854	-4.91919	0.00155714	0.00315	-5.05603	-4.36011	23.9466	23.3355	21.7284	29.2062	28.472	28.9885	23.6247	24.2963	22.3188	28.7467	27.8443	28.8169		32.439	0
Cre08.g359350.t1.2	acetyl-CoA carboxylase, biotin carboxylase subunit (accC)	0.00413631	0.00331429	-8.19962	-4.33739	0.00158398	0.00185075	-8.69372	-5.30325	23.1949	23.8609	19.448	30.1616	30.1407	30.8004	21.2192	23.1762	19.4228	29.2694	30.2407	30.3894		56.195	0
Cre04.g214150.t1.1	Thiazole biosynthetic enzyme; THI4 regulatory protein	0.00139594	0	-10.9049	-5.79355	0.00188164	0.00190769	-10.336	-5.38965	22.0988	18	18	30.5042	29.853	30.4563	22.2437	18	18	29.6145	29.9335	29.7035		36.892	0
Cre12.g485800.t1.2	FtsH-like membrane ATPase/metalloprotease	0.00020327	0	-5.04803	-5.67889	0.00191834	0.003	-4.71358	-4.09923	23.4472	24.0863	22.8601	28.6013	28.2003	28.7361	22.6059	24.6502	23.0242	28.012	27.9074	28.5016		77.546	GO:0005524,GO:0006508,GO:0004222
Cre01.g066917.t1.1	Chlorophyll a/b binding protein of LHCII	7.50293e-05	0	-5.92332	-6.93329	0.00191933	0.00303614	-4.84189	-4.14669	27.8903	28.2177	27.1237	33.8782	33.3945	33.7289	27.8662	29.7587	27.6859	33.1208	33.3691	33.3465		27.565	GO:0016020,GO:0009765	Photosynthesis	369.9
Cre04.g229300.t1.1	Rubisco activase	0.000193887	0	-6.25283	-6.40683	0.00235019	0.00307317	-5.33784	-4.18043	24.7816	24.6769	23.4197	30.653	30.181	30.8026	24.3832	26.3286	23.7801	30.0407	30.076	30.3886		45.029	GO:0005524
Cre12.g560950.t1.2	Photosystem I reaction center subunit V	1.42999e-05	0	-4.99276	-7.16653	0.00240571	0.00546939	-3.36403	-3.38888	27.4904	27.2496	27.1737	32.4854	32.4527	31.954	28.0369	29.3048	28.1914	31.7265	32.4321	31.4665		13.223	GO:0016020,GO:0015979,GO:0009522	Photosynthesis	369.9
Cre03.g156900.t1.2	Chlorophyll a/b binding protein of LHCII	7.59551e-05	0	-5.11837	-6.34145	0.00241885	0.00494382	-3.92263	-3.6479	27.8105	27.8535	26.9913	32.6172	32.485	32.9083	27.9114	29.4757	27.6998	32.0227	32.4361	32.3961		28.687	GO:0016020,GO:0009765	Photosynthesis	369.9
Cre12.g510050.t1.2	Copper target 1 protein	0.000691561	0	-6.2883	-5.40462	0.00260697	0.00311111	-5.72137	-4.21885	22.7734	23.1945	21.6096	28.5297	28.1908	29.722	21.8746	23.9027	22.11	28.0315	27.5654	29.4545		47.178	GO:0055114,GO:0046872,GO:0016491	oxido-reductase	4.63
Cre09.g416050.t1.2	Argininosuccinate synthase	0.00144666	0.00344554	-5.21707	-4.46845	0.00271357	0.00552577	-3.62053	-3.4559	24.6823	23.2415	22.5807	29.1851	28.6223	28.3484	24.5534	25.5911	23.8793	28.3834	28.6388	27.8633		49.021	GO:0006526,GO:0005524,GO:0004055
Cre10.g452050.t1.2	Light-harvesting protein of photosystem I	4.97996e-05	0	-5.46082	-6.87307	0.00275839	0.00488889	-4.06416	-3.63697	26.4771	26.5911	25.7512	31.724	31.5096	31.9684	26.811	28.3493	26.4771	30.8355	31.4706	31.5238		28.702	GO:0016020,GO:0009765	Photosynthesis	369.9
Cre01.g010900.t1.2	Glyceraldehyde-3-Phosphate Dehydrogenase	7.56863e-06	0	-4.26443	-6.6302	0.00292702	0.00576344	-3.85289	-3.5193	28.6545	28.8382	28.9648	33.0068	32.9411	33.3029	28.0466	29.8897	28.6235	32.2303	32.995	32.8931		40.304	GO:0055114,GO:0016620	oxidoreductase	4.63
Cre12.g509750.t1.2	Mitochondrial processing peptidase alpha subunit	0.00279417	0.00319266	-5.79207	-4.18795	0.00329574	0.00390909	-5.09867	-3.88395	24.1979	23.0395	21.3695	28.3596	28.3124	29.311	23.7996	24.1284	21.7343	27.7476	28.3767	28.8339		49.589	0
Cre06.g278213.t1.1	Light-harvesting protein of photosystem I	0.000194866	0	-4.67226	-5.45756	0.00341652	0.00619608	-3.11249	-3.10934	28.5042	28.3605	27.5152	32.656	32.5882	33.1524	28.984	30.1634	28.6668	31.9715	32.5301	32.65		27.781	GO:0016020,GO:0009765	Photosynthesis	369.9
Cre01.g002500.t1.2	Chlamyopsin, light-gated proton channel rhodopsin	0.00577715	0.00305263	-6.84527	-3.86111	0.00378105	0.00293023	-6.01229	-4.02204	25.1007	22.8982	20.7544	30.1864	29.4926	29.6102	24.6404	23.3222	21.676	29.8704	29.574	28.2311		26.577	#N/A
Cre01.g043350.t1.2	Chlorophyllide a oxygenase	0.436338	0.654514	0.636375	0.514627	0.00413882	0.00570213	-4.32068	-3.50477	23.7806	22.7529	23.7469	22.19	22.0825	24.0988	18	18	18	21.4454	21.7403	23.7764		72.106	GO:0055114,GO:0010277,GO:0051537,GO:0016491	oxido-reductase	4.63
Cre04.g232104.t1.1	Light-harvesting complex II chlorophyll a/b binding protein M3	8.385e-05	0	-4.71928	-5.97106	0.00427791	0.00625743	-3.5866	-3.22006	28.833	29.0675	28.365	33.669	33.0663	33.688	28.8282	30.6933	28.8966	32.9343	33.1123	33.1313		27.38	GO:0016020,GO:0009765	Photosynthesis	369.9
Cre16.g673650.t1.1	Minor chlorophyll a/b binding protein of photosystem II	0.00221357	0.00341176	-6.05244	-4.42791	0.00450117	0.00582609	-4.57178	-3.53459	28.1434	27.7904	25.3918	33.2391	33.0308	33.213	27.9462	29.5758	26.8465	32.6367	32.7443	32.7028		30.714	GO:0016020,GO:0009765	Photosynthesis	369.9
Cre16.g672650.t1.2	Mitochondrial substrate carrier protein, possible 2-oxoglutarate/malate carrier	0.000437374	0	-5.10775	-5.21834	0.00451255	0.00638384	-3.88011	-3.30542	25.7358	25.1208	24.2296	30.0439	29.8544	30.5111	25.8894	26.8397	24.782	29.0949	30.1348	29.9217		29.207	0
Cre01.g050950.t1.2	Geranylgeranyl diphosphate reductase / Geranylgeranyl reductase	0.000439348	0	-5.18177	-5.2537	0.00514601	0.00589011	-4.88055	-3.53953	25.4325	25.6262	24.406	30.4157	29.773	30.8214	24.3981	26.4806	24.0636	29.4742	29.355	30.7547		55.608	GO:0071949
Cre11.g467573.t1.1	Chlorophyll a/b binding protein of photosystem I, type III	0.000230248	0	-5.09734	-5.62996	0.00645359	0.00613592	-3.74436	-3.07387	26.8182	26.7304	25.7372	31.1059	31.7213	31.7506	27.2083	28.5275	26.405	30.4382	31.6806	31.2551		28.886	GO:0016020,GO:0009765	Photosynthesis	369.9
Cre02.g120250.t2.1	Calcium/calmodulin-dependent protein kinase	0.00928283	0.00415504	-5.57481	-3.30811	0.006936	0.00558333	-5.4495	-3.47873	18	18	18	21.9326	22.9156	25.8763	18	18	18	21.6144	23.4255	25.3087		79.655	GO:0006468,GO:0005524,GO:0004672
Cre12.g514200.t1.2	GLUCOSE-METHANOL-CHOLINE GMC OXIDOREDUCTASE	0.000905916	0.00247191	-5.68684	-4.97249	0.00734132	0.00632	-4.74119	-3.28595	26.1566	27.0558	24.9743	31.7912	31.3385	32.1175	25.9249	28.4852	25.4798	31.159	31.4286	31.5258		64.459	GO:0055114,GO:0016614,GO:0050660	oxido-reductase	4.63
Cre16.g687900.t1.2	Light-harvesting protein of photosystem I	1.01253e-05	0	-5.38629	-7.75501	0.0080206	0.00749091	-3.41282	-2.85372	27.8318	28.2385	27.7349	33.5099	33.1027	33.3514	29.1959	30.6944	28.3504	32.6082	33.0249	32.8461		26.222	GO:0016020,GO:0009765	Photosynthesis	369.9
Cre06.g272650.t1.2	Light-harvesting protein of photosystem I	0.000920146	0.0025	-5.77167	-4.99313	0.00990025	0.00762963	-4.19805	-2.97908	26.998	27.1246	25.3073	32.3954	31.6797	32.6698	27.1918	29.2301	26.2195	31.3928	31.7597	32.083		25.921	GO:0016020,GO:0009765	Photosynthesis	369.9
Cre12.g546050.t1.2	1-deoxy-D-xylulose 5-phosphate reductoisomerase, chloroplast precursor	0.00344437	0.00348	-8.07496	-4.47942	0.0179031	0.00686792	-7.04303	-3.03956	21.8541	18	18	27.6424	26.9362	27.5004	23.2122	18	18	25.8266	27.6669	26.8478		49.509	GO:0005515,GO:0070402,GO:0055114,GO:0046872,GO:0030604,GO:0008299	oxido-reductase	4.63
Cre02.g099850.t1.1	Pyruvate dehydrogenase, E1 component, alpha subunit	0.00354961	0.00351515	-8.43208	-4.50563	0.0180831	0.00607692	-7.50524	-3.07306	18	22.063	18	28.1385	27.8272	27.3936	18	23.8209	18	27.2932	27.5951	27.4483		51.705	GO:0030976,GO:0003824
Cre16.g656400.t1.2	UDP-sulfoquinovose synthase	0.0005927	0	-6.98017	-5.77984	0.0212031	0.00722807	-4.98005	-2.68719	18	18.9063	19.6441	25.406	25.2123	26.8727	18	21.5153	21.2966	24.0632	25.0978	26.5911		52.873	GO:0050662,GO:0003824
Cre07.g344950.t1.2	Light-harvesting protein of photosystem I	0.000634138	0.00234043	-4.6713	-4.75719	0.0214976	0.00648819	-3.16939	-2.32203	26.4833	27.3245	25.6991	31.1564	30.9928	31.3717	27.0212	29.2464	26.4498	30.48	30.9707	30.7749		22.844	GO:0016020,GO:0009765	Photosynthesis	369.9
Cre02.g142146.t1.1	Divinyl chlorophyllide a 8-vinyl-reductase / [4-vinyl]chlorophyllide a reductase	0.000100296	0	-5.74828	-6.6066	0.0232528	0.0064375	-3.15473	-2.28236	21.8567	21.4352	22.537	27.7041	27.3659	28.0036	23.2169	23.7594	23.7956	25.5852	28.4301	26.2207		40.863	0
Cre02.g141400.t1.2	Phosphoenolpyruvate carboxykinase	0.00298073	0.003625	-8.4619	-4.66805	0.0255965	0.00735714	-7.15032	-2.79207	18	18	21.7195	27.9125	26.872	28.3208	18	18	23.9546	26.3705	26.8214	28.2137		67.536	GO:0006094,GO:0005524,GO:0004612
Cre09.g416800.t1.2	Miscellaneous	0.0108276	0.00363636	-7.5744	-3.46904	0.0270741	0.00729204	-6.82927	-2.72754	22.9965	18	18	27.6269	26.7859	27.3069	24.0092	18	18	26.9432	26.7828	26.7709		22.779	0
Cre12.g523850.t1.2	Ubiquinol:cytochrome c oxidoreductase	0.0111891	0.0041875	-6.63969	-3.3368	0.0298207	0.00692437	-5.78714	-2.5703	18	22.4973	22.4153	27.7974	27.4109	27.6235	18	23.6189	22.7853	27.1702	27.2339	27.3615		55.054	0
Cre12.g498550.t1.1	Magnesium protoporphyrin O-methyltransferase	0.0148802	0.00478788	-6.66667	-3.13445	0.0372215	0.0067541	-5.79008	-2.4279	22.6972	22.9664	18	27.7843	27.5761	28.3032	22.8299	24.1826	18	27.1149	27.5709	27.697		34.993	0
Cre01.g015350.t1.1	Light-dependent protochlorophyllide reductase	0.0196596	0.00451429	-7.08297	-2.97555	0.0415314	0.00664516	-6.22664	-2.39192	24.0363	18	23.12	28.8092	28.6378	28.9582	23.8767	18	24.5765	28.0478	28.9204	28.1649		41.871	GO:0016491,GO:0008152	Metabolic Process	2.8
Cre09.g416150.t1.2	Mitochondrial F1F0 ATP synthase associated 19.5 kDa protein	0.0111824	0.00357724	-7.72395	-3.45927	0.0421708	0.00669919	-6.69781	-2.41436	22.9547	18	18	27.8151	26.331	27.9804	24.7615	18	18	27.4795	26.4289	26.9466		22.203	0
Cre07.g331500.t1.1	Inactive subunit of chloroplast ClpP complex	0.000374955	0	-7.39561	-6.34068	0.0451248	0.00629008	-5.34448	-2.26719	18	18	19.9065	26.026	25.6863	26.3809	18	18	23.4399	24.3578	25.6272	25.4883		46.857	0
Cre14.g619100.t1.2	Inactive subunit of chloroplast ClpP complex	0.00862898	0.00354839	-6.15009	-3.45422	0.0483364	0.00624242	-4.79068	-2.17254	22.2316	21.0929	18	26.5254	26.2774	26.9719	22.7248	23.1382	18	25.4855	25.8187	26.9309		46.219	0
Cre07.g337650.t1.2	Mitochondrial pyruvate dehydrogenase complex, E1 component	0.00321085	0.00334615	-6.98202	-4.34981	0.0252862	0.00716522	-5.86205	-2.68518	18	18	20.7428	26.8187	24.7152	26.1549	18	18	22.9762	25.1864	25.2874	26.0886		43.71
												Colour code for different protein groups
													Photosynthesis
													Metabolic Process
													oxido-reductase
													transporter

## Sheet: 8 Fold categorization
		Manual Categorization								Blast2GO
	Class	Number of proteins	Sum of Intensity	% Area					Biologocal process		Number of proteins	fold enrichment
	Mitochondrial	9	-58.1211	-10.7519					Transporter		3	138.7
	Light related proteins	5	-36.5505	-6.76153					Oxido-reductase		13	4.63
	Transport	4	-28.7783	-5.32373					Metabolic process		4	2.8
	Oxidoreductases	7	-45.7003	-8.45415					Photosynthesis		12	369.9
	Chloroplast Proeins	5	-29.5672	-5.46968
	Chlorophyll binding proteins	5	-20.4162	-3.77681					Colour code for different protein groups in GO, Biological process
	Photosystem Proteins	8	-29.7527	-5.50398
	Metabolic Proteins	22	-149.126	-27.5871						transporter
	Hypothetical	10	-59.5268	-11.0119						oxido-reductase
	Chaperones	2	-11.6095	-2.14766						Metabolic Process
	Proteases	5	-27.6994	-5.12415						Photosynthesis
	General	8	-43.7172	-8.08729
	Total	90	-540.566
